# Supplementary material for: Progressive overfilling of readily releasable pool underlies short-term facilitation at recurrent excitatory synapses in layer 2/3 of the rat prefrontal cortex
Source: eLife journal article supplement (doi:10.7554/elife.102923), 2025-01-08
Supplement: fig9-data1 [file param.xls]

## Sheet: Sheet1
Var1	pw1	pw2	pw3	pw4
Aca	1	1	1	1
Alocal	40	40	40	40
kcloc
kc1	20	20	20	20
kc2	20	20	20	20
Clow	1	1	1	1
Nsite	10	10	10	10
Nmax	6	6	6	6
pnb	1	1	1	1
knb	6	6	6	8
knr	14	14	14	5
Knmx	300	220	180	0
bSyt	0.35	0.2	0.05	0.35
Vstep	5	4	3	5
