# Supplementary material for: Progressive overfilling of readily releasable pool underlies short-term facilitation at recurrent excitatory synapses in layer 2/3 of the rat prefrontal cortex
Source: eLife. 2026 Feb 18;14:RP102923. doi: 10.7554/eLife.102923 (PMC12890252; doi:10.7554/eLife.102923)
Supplement: Figure 1—figure supplement 1—source data 1. [file elife-102923-fig1-figsupp1-data1.xlsx]

## Sheet: freq
PC
0	0	0	0	0	0	0	0	0	0	0	0	0	0	0	0	0	0	0	0	0	0	0	0	0	0	0	0	0	0	0	0	0	0	0	0	0	0	0	0	0	0	0	0	0	0	0	0	0	0
0	0	0	0	0	0	0	0	0	0	0	0	0	0	0	0	0	0	0	0	0	0	0	0	0	0	0	0	0	0	0	0	0	0	0	0	0	0	0	0	0	0	0	0	0	0	0	0	0	0
0	0	0	0	0	0	0	0	0	0	0	0	2	0	0	0	0	0	0	0	0	0	0	0	0	0	0	0	0	0	0	0	0	0	0	0	0	0	0	0	0	0	0	0	0	0	0	0	0	0
0	0	0	0	0	0	0	0	0	0	0	0	10	0	0	0	0	0	0	0	0	0	0	0	4	0	0	6	0	0	0	0	0	0	0	0	0	0	0	0	0	0	0	0	0	0	0	0	0	0
0	0	0	0	0	0	0	0	0	0	0	0	16	0	0	0	0	0	0	4	0	0	0	0	10	0	0	12	0	0	0	8	0	0	0	0	0	0	0	0	0	0	4	0	0	0	0	0	2	0
0	0	0	0	0	0	0	6	0	0	0	6	20	0	0	0	0	0	0	12	4	0	4	0	14	0	0	16	2	0	0	16	0	0	0	0	0	0	0	0	0	0	10	0	0	0	0	14	6	0
2	0	4	4	0	0	0	10	4	0	6	12	24	6	4	6	0	0	0	18	12	0	10	0	20	6	0	18	8	0	0	22	0	0	2	0	0	8	2	6	0	0	12	0	0	0	0	22	10	0
8	0	12	10	4	6	6	14	10	0	12	18	26	10	10	14	0	2	6	22	18	6	14	0	24	12	4	20	12	0	4	28	0	0	8	0	0	14	10	12	8	8	16	0	6	0	8	28	14	6
14	6	18	14	10	10	10	16	14	4	18	20	28	14	14	18	4	8	10	26	24	10	20	0	26	18	10	24	16	4	8	34	0	2	10	6	0	20	14	18	12	14	18	0	12	0	12	32	16	16
18	12	24	18	16	14	14	20	18	10	24	24	30	18	20	24	10	12	16	30	28	12	22	2	28	22	16	26	20	12	12	36	0	8	14	10	0	24	18	24	16	18	20	8	18	10	18	36	20	22
20	16	30	22	20	18	16	22	22	14	28	28	30	22	22	28	14	16	20	32	30	16	26	6	32	28	20	28	22	18	18	40	6	10	16	12	0	28	22	28	20	24	24	14	22	16	22	38	22	28
[truncated: 80 more columns]
