# Supplementary material for: Progressive overfilling of readily releasable pool underlies short-term facilitation at recurrent excitatory synapses in layer 2/3 of the rat prefrontal cortex
Source: eLife. 2026 Feb 18;14:RP102923. doi: 10.7554/eLife.102923 (PMC12890252; doi:10.7554/eLife.102923)
Supplement: Figure 1—figure supplement 4—source data 1. [file elife-102923-fig1-figsupp4-data1.xlsx]

## Sheet: norm
Opto										Dual
1	1	1	1	1	1	1	1	1	1	1	1	1	1	1
0.419589	0.235702	0.616565	0.519651	0.538981	0.538423	0.0955426	0.531779	0.28077	0.605904	0.244754	0.418614	0.50137	0.454294	0.500076
0.677726	0.340266	0.717357	0.576539	0.324707	0.606831	0.0800787	0.831913	0.70907	0.824866	0.567226	0.874176	0.70411	0.636196	0.756366
0.956689	0.790295	0.695289	0.806031	0.597492	0.486188	0.0934893	0.993531	0.812335	1.01262	1.13846	1.05858	1.89041	0.438597	0.695798
0.837264	0.853906	0.469798	0.697106	0.559717	0.509895	0.177268	0.845877	0.750873	0.846367	1.00886	0.739698	0.989041	0.571561	0.779215
0.832897	0.779703	0.748762	1.09477	1.01407	0.726469	0.223489	1.01119	0.755556	1.00712	1.03512	0.968577	0.830137	0.373961	0.809738
0.737801	0.938443	1.04081	0.695393	0.716203	0.758011	0.120182	1.08759	0.585062	1.07612	0.827481	0.769123	0.994521	0.288089	0.654051
0.659561	0.518968	1.59881	1.12391	0.775197	0.787544	0.185032	1.24931	0.711425	0.944774	0.918169	1.02916	1.07123	1.59372	0.682109
0.630306	1.0027	1.15533	0.599967	0.718373	0.802411	0.156714	0.879967	0.597682	0.811383	0.814194	0.751415	0.849315	0.626039	0.618017
0.666542	0.732781	1.34425	0.972093	0.771821	0.754495	0.21149	0.823493	0.730051	0.901988	0.914162	0.927768	1.03288	0.378578	0.705008
0.640462	0.866551	1.23829	1.01606	0.668301	0.685485	0.31469	0.769278	0.703619	0.730953	0.537488	0.728647	0.953425	1.03324	0.573427
0.638548	0.971051	1.46265	0.491	0.945105	0.802913	0.162574	0.789814	0.580273	0.691979	0.959823	0.896678	0.542466	0.296399	0.666985
0.529675	0.892355	1.22846	1.02006	0.940122	1.0444	0.139988	0.654174	0.650095	0.742027	0.569862	0.726649	1.15342	0.587258	0.672169
0.444408	1.27267	1.42411	0.702308	0.829609	0.685686	0.27912	0.898142	0.501111	0.499658	0.700728	0.67379	0.841096	0.590951	0.586236
0.580037	0.860196	1.42771	0.678405	0.909179	0.737117	0.272683	1.10679	0.729151	0.659871	0.457661	0.681912	0.810959	0.807941	0.415224
0.46262	1.01188	1.79431	0.52318	0.793683	0.727574	0.363584	0.703768	0.522807	0.731492	0.726563	0.642634	0.608219	0.277008	0.488752
0.355615	0.996726	1.74077	0.952153	0.843755	0.623807	0.119669	0.882945	0.522436	0.482221	0.309923	0.539178	0.865753	0.524469	0.512204
0.560518	0.934014	1.79651	0.764728	0.598939	0.752285	0.232258	0.852141	0.483993	0.572574	0.863123	0.708941	1.19178	0.468144	0.642224
0.44707	0.95295	1.53544	0.950708	0.897605	0.687896	0.387368	0.796078	0.471743	0.741632	0.789834	0.65748	1.00822	0.707734	0.662582
0.466425	0.722704	1.96407	0.849317	0.800675	0.528579	0.149698	0.865181	0.640306	0.502643	0.737741	0.94055	0.591781	0.44783	0.597106

## Sheet: abs
Opto										Dual
26.7392	48.5836	72.9457	40.9924	39.42	74.21	29.5294	63.9532	15.9537	51.9724	45.9362	87.3152	15.9127	27.5421	96.2515
3.49935	51.9517	14.0526	28.7505	0.0871931	8.36182	4.01088	20.1939	7.76811	6.09295	11.2431	36.5513	7.97817	12.5122	48.133
5.87391	46.0465	18.2728	32.09	9.52439	12.0762	16.465	37.4814	20.6463	15.2192	26.0562	76.3288	11.2043	17.5222	72.8014
1.68283	55.3385	34.5285	38.9114	16.0987	14.599	14.2474	56.3325	22.2844	15.0236	52.2965	92.4305	30.0816	12.0799	66.9715
14.6455	43.0101	57.6346	73.3904	25.8266	42.3642	26.7886	65.7785	30.0895	27.2307	46.3431	64.5868	15.7384	15.742	75.0006
24.882	50.6592	67.6357	59.3145	29.1922	60.4045	13.1458	89.2799	44.5213	38.003	47.5493	84.5715	13.2097	10.2997	77.9385
26.6927	59.2178	86.1758	72.533	49.3629	69.5714	21.5687	99.1792	39.7231	45.7473	38.0113	67.1561	15.8255	7.93457	62.9534
23.6758	52.2389	110.18	73.4631	34.5023	79.77	15.0902	119.62	54.3107	51.3277	42.1772	89.8612	17.0463	43.8944	65.654
36.935	47.91	100.545	61.0061	37.3332	71.6059	34.7116	126.351	48.7621	65.7172	37.401	65.6099	13.5149	17.2424	59.4851
39.1439	53.3092	113.944	62.0495	41.6173	72.1988	18.5838	126.462	38.1192	59.7035	41.9932	81.0082	16.4359	10.4268	67.858
37.7168	41.8099	121.068	58.3351	46.0554	68.2547	18.3222	117.086	50.2813	56.6729	24.6902	63.6219	15.1716	28.4576	55.1932
35.691	48.9683	108.073	51.3248	38.3272	74.8436	17.2439	120.079	64.6841	61.4843	44.0906	78.2936	8.63212	8.16345	64.1983
48.4329	63.0491	119.917	62.8197	27.1345	76.6107	15.3663	120.777	54.3134	60.2055	26.1773	63.4475	18.3541	16.1743	64.6973
49.8715	48.7785	118.937	61.9042	40.9284	65.3163	17.9531	131.923	44.989	60.6758	32.1888	58.8321	13.3841	16.276	56.426
35.3946	52.5843	99.8303	77.3315	36.4554	63.3109	13.7678	112.499	52.2762	66.9537	21.0232	59.5412	12.9046	22.2524	39.9659
50.7783	46.6073	103.661	78.6365	43.8814	54.394	12.1169	120.62	50.321	57.7747	33.3756	56.1116	9.67843	7.62939	47.0431
50.5313	42.8734	99.746	68.4233	43.9802	65.171	17.6857	112.04	47.1582	62.5491	14.2367	47.0784	13.7765	14.445	49.3004
38.5452	44.6429	93.4565	66.7899	35.4876	44.733	20.0922	111.596	49.169	53.6766	39.6486	61.9013	18.9645	12.8937	61.815
34.5081	45.4703	103.661	59.8406	40.725	44.4336	18.1478	103.359	45.4514	56.3135	36.282	57.4079	16.0435	19.4925	63.7745
38.1731	39.7224	75.1517	82.0225	27.4309	45.2329	22.3272	85.0162	42.035	57.1987	33.889	82.1243	9.41685	12.3342	57.4723
