# Supplementary material for: Progressive overfilling of readily releasable pool underlies short-term facilitation at recurrent excitatory synapses in layer 2/3 of the rat prefrontal cortex
Source: eLife. 2026 Feb 18;14:RP102923. doi: 10.7554/eLife.102923 (PMC12890252; doi:10.7554/eLife.102923)
Supplement: Figure 1—figure supplement 5—source data 1. [file elife-102923-fig1-figsupp5-data1.xlsx]

## Sheet: stp
Control												Kyn
1	1	1	1	1	1	1	1	1	1	1	1	1	1	1	1	1	1	1	1	1	1	1	1
0.963721	0.768291	1.22063	0.476852	0.291092	0.933034	0.932782	1.28271	1.23242	0.890583	0.682098	1.25585	1.09795	0.571714	1.61231	1.05115	0.640699	1.03187	0.924077	1.32635	1.70208	0.903176	0.380622	0.890433
1.34892	1.37727	1.26187	1.10115	1.56027	1.12447	1.58461	1.29089	1.49443	1.43535	0.755026	1.40893	1.51043	0.95067	0.978394	1.28846	1.26865	1.29471	1.18907	1.18741	2.00944	0.881017	0.638189	1.06076
1.36228	1.35335	1.72724	1.2292	0.933015	1.53282	1.574	1.28726	1.64408	1.24442	0.752356	1.95341	1.52613	0.725977	1.78516	2.134	1.63173	1.46056	1.7229	1.42608	1.78016	0.779823	1.52051	0.971747
1.63814	1.72149	2.33022	1.12783	0.970307	1.44244	1.66737	1.38152	2.3765	1.85604	1.00794	2.22668	1.58617	1.1343	1.25764	2.2993	1.62842	1.30497	1.86736	1.54409	2.67307	1.00862	2.04031	1.48019
1.70258	2.17192	2.68178	1.35647	1.85454	1.54519	1.89714	1.26561	2.69683	2.16716	1.28259	2.31063	1.66774	1.07243	1.40359	1.91673	1.9221	1.29376	1.83338	1.40665	2.57748	0.711868	2.17723	2.42586
1.73006	1.59457	2.51639	1.16834	1.85048	1.48016	1.9683	1.2971	2.87693	1.78557	1.06039	2.2155	1.67297	1.29056	2.48471	2.16939	1.50425	1.42355	1.83043	1.25466	2.4625	1.14933	2.21033	1.96532
1.87264	2.02289	2.60654	1.16573	1.3883	1.63642	1.82141	1.49505	1.8274	1.38383	1.61421	2.30103	1.92333	1.22156	2.48186	2.42103	2.15817	1.31956	1.55214	1.43942	2.38871	0.957836	2.28175	2.77202
1.89125	1.47769	2.54718	1.33724	1.87416	1.46913	1.85459	1.22911	2.87243	1.36424	2.25098	2.2347	1.9289	1.13174	3.12556	2.22054	2.54155	1.35521	1.52408	1.41518	2.68028	1.29613	2.22093	2.69507
2.12812	1.77858	3.13027	1.55021	1.25239	1.42654	1.53059	1.40502	3.10034	1.68541	1.35967	2.20088	1.94165	1.49786	3.1276	2.00614	2.06657	1.31105	1.7486	1.61407	2.43453	0.914871	3.78925	2.32353
2.14495	1.50032	3.14049	1.13955	1.92665	1.50431	1.82585	1.45314	3.14901	1.74828	1.86779	2.38573	2.22984	1.63302	3.35997	2.18944	1.695	1.43233	1.65258	1.51161	2.90218	0.914625	3.4495	2.87263
1.70478	1.93275	2.95743	1.18502	1.47932	1.6221	2.04329	1.48647	3.72834	1.761	1.76037	2.30737	2.28903	1.7274	2.73991	2.02496	1.88574	1.22771	1.84727	1.84987	3.02248	1.19537	4.25446	2.76927
2.05514	2.14941	2.93098	1.30156	1.87451	1.31154	1.60705	1.07637	2.35356	1.61234	2.18748	2.03727	2.07878	1.60536	3.25397	1.92001	2.18886	1.58455	1.54505	1.34958	3.28848	1.21144	4.28091	2.81555
1.97243	1.95358	3.56519	1.03474	1.75539	1.4502	1.49297	1.07294	2.40523	1.71547	1.86475	2.29591	2.25872	1.16709	3.68528	2.03764	2.14212	1.16748	1.69453	1.29445	3.25691	1.13948	4.94908	2.94763
1.86926	1.88736	3.26086	1.0668	1.33864	1.36055	1.86852	1.45327	3.23242	1.76787	1.60687	2.44293	2.16964	1.00399	2.77212	1.75286	2.02313	1.61359	1.2644	1.06065	3.48344	1.13948	3.67496	3.9992
1.78731	1.56294	3.08014	1.16212	1.5	1.823	1.82721	1.27016	3.56925	1.19896	1.70732	2.16044	1.89107	1.18848	3.38443	1.76002	1.64542	1.32347	1.4647	1.42572	2.55758	1.1822	4.0198	3.57264
1.67628	1.88775	3.14416	0.982771	1.4286	1.30559	1.80439	1.39261	2.90823	1.69733	2.286	2.56983	2.13983	1.31252	3.37587	2.16121	2.44098	1.37547	1.79616	1.38364	2.34752	1.08359	3.81966	4.03411
1.95146	1.96618	3.58975	1.20714	1.66295	1.75798	1.72669	1.29459	2.66381	1.49382	2.04073	2.36187	2.07583	1.5663	3.54179	1.93351	2.32814	1.58887	1.64372	1.60618	3.16732	1.4651	4.78642	3.31044
1.97412	1.66337	3.51406	0.87962	1.41675	1.4764	1.46177	1.58898	2.70755	1.26675	1.7827	2.16314	2.02601	1.39093	3.06074	1.70806	2.15297	1.58104	1.67326	1.55908	3.2334	1.67617	4.08303	3.65017
2.19095	1.7364	3.48049	1.17034	2.16313	1.49715	1.60903	1.54871	2.63894	1.91154	1.92136	2.8677	2.16035	1.3935	3.50306	1.74427	2.23088	1.19152	1.37755	1.48724	3.25296	1.37597	3.95021	2.7904
