# Supplementary material for: Progressive overfilling of readily releasable pool underlies short-term facilitation at recurrent excitatory synapses in layer 2/3 of the rat prefrontal cortex
Source: eLife. 2026 Feb 18;14:RP102923. doi: 10.7554/eLife.102923 (PMC12890252; doi:10.7554/eLife.102923)
Supplement: Figure 1—source data 1. [file elife-102923-fig1-data1.xlsx]

## Sheet: ee
5Hz	sem	10Hz	sem	20Hz	sem	40Hz	sem
1	0	1	0	1	0	1	0
1.08302	0.0822478	0.996973	0.059796	0.893495	0.070482	0.326483	0.105692
1.27468	0.105963	1.2843	0.113884	1.16449	0.064508	0.533574	0.119018
1.39835	0.0989686	1.42977	0.070866	1.30019	0.0767868	0.627888	0.138759
1.36484	0.114808	1.50338	0.0740793	1.56336	0.102408	0.95852	0.156114
1.55696	0.099969	1.71414	0.117253	1.79272	0.106358	1.1265	0.208086
1.53281	0.126173	1.71914	0.119952	1.78143	0.107	1.3009	0.164828
1.64315	0.136693	1.9045	0.118015	1.7545	0.0960651	1.39867	0.260683
1.73158	0.178177	1.88244	0.160136	1.86491	0.131909	1.46181	0.202217
1.7804	0.140084	2.09384	0.145323	1.92037	0.156693	1.38104	0.163352
1.71551	0.158754	2.13002	0.144499	1.96297	0.152792	1.41354	0.226055
1.86708	0.16754	1.99146	0.13949	2.02903	0.176585	1.47562	0.306466
1.79354	0.161179	2.05087	0.143737	1.97602	0.14799	1.49779	0.255847
1.86523	0.180251	1.98827	0.110215	1.95752	0.159479	1.45864	0.209287
1.83057	0.128959	2.07206	0.1759	1.94796	0.145646	1.42293	0.244938
1.84885	0.176088	1.93628	0.139057	2.00819	0.164698	1.46061	0.248971
1.85366	0.163616	2.16509	0.134597	1.98518	0.165988	1.4313	0.214728
1.84753	0.156701	2.03222	0.156114	2.04867	0.172008	1.33141	0.229465
1.77431	0.17906	1.94785	0.144568	1.92591	0.168375	1.29024	0.204145
1.96151	0.194789	2.13061	0.177836	2.06065	0.17637	1.24026	0.203778

## Sheet: ie
5Hz	sem	10Hz	sem	20Hz	sem	40Hz	sem
1	0	1	0	1	0	1	0
1.22256	0.134153	1.01224	0.111023	0.750488	0.0972941	0.44511	0.0541264
1.17115	0.0946449	1.03005	0.0800229	0.908347	0.0973119	0.574909	0.0734376
1.33246	0.104435	1.21609	0.158132	1.06011	0.0938282	0.739279	0.0814051
1.43791	0.133196	1.32692	0.136369	1.04389	0.076542	0.658344	0.0695821
1.4614	0.223405	1.26287	0.172313	1.08944	0.121621	0.829733	0.0704584
1.338	0.167887	1.37814	0.173957	1.05248	0.118542	0.777941	0.090147
1.34001	0.146832	1.42799	0.190818	1.16959	0.127466	0.857519	0.124423
1.50875	0.146159	1.37443	0.2018	1.27809	0.124005	0.736516	0.0850233
1.75058	0.211682	1.37268	0.209762	1.16527	0.150454	0.795662	0.0855861
1.63516	0.214743	1.41439	0.205076	1.21298	0.145945	0.764178	0.0766692
1.56059	0.143267	1.61911	0.271652	1.20915	0.144805	0.760553	0.104237
1.69366	0.210964	1.54003	0.259346	1.25901	0.16001	0.787999	0.0957284
1.6178	0.142398	1.55739	0.244745	1.20276	0.156367	0.753952	0.115439
1.50182	0.166443	1.46436	0.235685	1.20511	0.176952	0.799842	0.0963558
1.7858	0.214843	1.49798	0.257169	1.31633	0.220811	0.76349	0.128979
1.69727	0.169273	1.64453	0.290035	1.21008	0.18776	0.758664	0.139591
1.65946	0.111278	1.51291	0.258171	1.33271	0.216145	0.757985	0.130642
1.80891	0.267605	1.58515	0.236678	1.23094	0.210437	0.786848	0.10611
1.81164	0.2717	1.55379	0.274	1.18671	0.175606	0.752553	0.149871
