# Supplementary material for: Progressive overfilling of readily releasable pool underlies short-term facilitation at recurrent excitatory synapses in layer 2/3 of the rat prefrontal cortex
Source: eLife. 2026 Feb 18;14:RP102923. doi: 10.7554/eLife.102923 (PMC12890252; doi:10.7554/eLife.102923)
Supplement: Figure 2—source data 1. [file elife-102923-fig2-data1.xlsx]

## Sheet: EGTA-AM
ctrl	sem	EGTA	sem
1	0	1	0
0.406573	0.0519442	0.192838	0.0353691
0.549625	0.071353	0.171726	0.0251609
0.82472	0.0998611	0.233821	0.036142
0.879926	0.0857304	0.319025	0.052055
1.03728	0.109781	0.357707	0.0460638
1.12442	0.0957783	0.387423	0.0602537
1.05909	0.109164	0.444918	0.0644111
1.21906	0.0982456	0.521588	0.0732375
1.45454	0.120882	0.51152	0.0618907
1.32996	0.141958	0.661417	0.0878672
1.30727	0.102388	0.677311	0.0877231
1.32923	0.117781	0.592326	0.0718963
1.30127	0.102712	0.691722	0.0868136
1.32749	0.126414	0.699752	0.0961656
1.24254	0.099365	0.700176	0.101234
1.34121	0.105951	0.774987	0.100973
1.30117	0.104405	0.769541	0.107478
1.28323	0.118598	0.797198	0.0800122
1.28319	0.121124	0.838078	0.108283
1.36591	0.146043	0.733649	0.0966776
1.21004	0.102265	0.815121	0.0997462
1.19775	0.0829826	0.877961	0.124574
1.24974	0.129179	0.854945	0.115535
1.26391	0.130802	0.827816	0.122346
1.07239	0.0950531	0.830538	0.125107
1.17879	0.124259	0.82034	0.111632
1.01629	0.0979977	0.876729	0.122564
1.10289	0.0833539	0.843089	0.109839
1.04697	0.0940517	0.794391	0.103407
2.11216	0.144167	1.95608	0.167236
0.579049	0.0715725	0.526258	0.114284
0.944157	0.119103	0.745833	0.0711838
1.17091	0.112797	0.827642	0.10984
1.23713	0.0971398	0.919184	0.103828
1.11542	0.0951364	0.889553	0.117749
1.31254	0.0954203	0.785524	0.108826
1.09437	0.111442	0.802517	0.121144
1.20045	0.117803	0.844758	0.104487
1.15125	0.0841488	0.874214	0.12142
1.11609	0.0928059	0.850927	0.111432
0.906849	0.0889352	0.813847	0.105836
0.971955	0.0919089	0.811467	0.123278
0.972269	0.139123	0.908447	0.123104
0.989304	0.100573	0.69904	0.109685
0.858213	0.089794	0.77579	0.127436
0.802504	0.0786602	0.832077	0.112381
0.787281	0.0983775	0.80503	0.132944
0.799233	0.106881	0.707309	0.104078
0.768351	0.0752865	0.761103	0.105575
0.799395	0.0938275	0.716284	0.101748
0.831415	0.0810768	0.669011	0.102685
0.702487	0.0677269	0.691778	0.101588
0.7543	0.0480755	0.699412	0.112729
0.825466	0.139036	0.673446	0.0924812
0.647187	0.0677264	0.698574	0.100268
0.69779	0.0614141	0.703667	0.102034
0.631579	0.0573384	0.625333	0.10026
0.659779	0.0872033	0.653347	0.0972861
0.731068	0.0967304	0.619468	0.0820892
