# Supplementary material for: Progressive overfilling of readily releasable pool underlies short-term facilitation at recurrent excitatory synapses in layer 2/3 of the rat prefrontal cortex
Source: eLife. 2026 Feb 18;14:RP102923. doi: 10.7554/eLife.102923 (PMC12890252; doi:10.7554/eLife.102923)
Supplement: Figure 2—source data 2. [file elife-102923-fig2-data2.xlsx]

## Sheet: Sheet1
cell_0	cell_1	cell_2	cell_3	cell_4	cell_5	cell_6	cell_7	cell_8	cell_9	cell_10	cell_11	mean	sem
1	1	1	1	1	1	1	1	1	1	1	1	1	0
0.693667	1.13492	0.814555	1.44407	1.0282	1.03291	1.0578	1.19901	1.17135	1.3339	1.01461	1.17559	1.09171	0.0589949
1.08648	1.07899	1.01364	1.48504	1.58642	1.21618	1.29517	1.39103	1.27017	1.07667	1.22088	1.38064	1.25844	0.051556
1.41386	1.23215	1.1778	1.71497	1.74153	1.55035	1.66594	1.56147	1.50854	1.68883	1.55545	1.31049	1.51011	0.0546937
1.68683	1.43004	1.39281	2.06995	1.76846	1.63713	1.0945	1.67302	1.2131	1.628	1.59042	1.29467	1.53991	0.0774249
1.60824	1.2219	1.33554	1.95444	2.14333	1.39094	1.51863	1.65435	1.36771	1.79171	1.67236	1.37199	1.58593	0.0794223
1.5473	1.58611	1.4815	1.53514	1.64488	1.89926	1.58146	1.64085	1.41796	1.80653	1.52614	1.30819	1.58128	0.0458089
1.43922	1.36173	1.53752	2.2114	2.05427	1.78863	1.50099	1.85184	1.27159	1.57284	1.53216	1.59394	1.64301	0.0810222
1.64135	1.62233	1.58301	2.19264	1.79011	1.74741	1.52547	1.62247	1.28349	1.86735	1.96416	1.49013	1.69416	0.0689527
1.55881	1.36668	1.53111	2.12619	1.84616	1.65837	1.31703	1.79074	1.53881	1.72693	1.7935	1.68789	1.66185	0.0638014
2.53401	1.58516	1.71842	2.33371	2.01654	1.9281	1.49326	1.89539	1.47147	2.05359	1.70391	1.92917	1.88856	0.0932152
1.9888	1.78474	1.23362	2.21717	2.11387	1.83892	1.3557	1.99	1.35586	1.93712	1.73796	1.7767	1.77754	0.0903958
0.279621	1.24583	0.22638	1.73997	1.23906	0.773179	0.331215	0.744863	0.711779	0.676679	0.905477	0.785753	0.804984	0.127102
0.710777	1.33933	0.543312	2.26131	2.05277	1.3247	0.592254	1.17196	0.974977	0.796286	1.44689	1.04853	1.18859	0.156313
0.801994	1.28921	1.03701	2.62635	2.22201	1.83581	0.718637	1.57088	0.861662	1.14289	1.53997	1.36902	1.41795	0.168264
0.916477	1.15012	0.938598	2.82608	2.59975	1.76431	0.807439	1.54053	1.03509	1.45221	1.5091	1.23885	1.48155	0.186267
0.941835	1.28357	1.29006	2.94196	2.36293	1.8812	0.526241	1.32663	0.888007	1.09175	1.4098	1.603	1.46225	0.192527
1.42168	1.40981	0.976432	2.60561	2.10072	1.75038	0.681275	1.322	0.743668	1.39118	1.58696	1.58421	1.46449	0.156179
1.4575	1.08029	1.26421	2.35654	1.96778	1.6109	0.678427	1.24282	0.587275	1.21286	1.22184	1.62666	1.35893	0.143272
