# Supplementary material for: Progressive overfilling of readily releasable pool underlies short-term facilitation at recurrent excitatory synapses in layer 2/3 of the rat prefrontal cortex
Source: eLife. 2026 Feb 18;14:RP102923. doi: 10.7554/eLife.102923 (PMC12890252; doi:10.7554/eLife.102923)
Supplement: Figure 3—figure supplement 1—source data 1. [file elife-102923-fig3-figsupp1-data1.xlsx]

## Sheet: ee
WT	KD
22.78	24.93
17.38	19.35
28	25.71
24.98	20.01
25.21	24.91
21.71	24.77
23.17	28.43
18.68	26.91
35.76	19.04
34.14	32.35
19.45	28.8
29.03	22.89
21.82	26.08
23.44
25.77
21.81

## Sheet: ie
WT	KD
27.08	28.65
18.77	35.68
46.36	29.48
29.39	30.56
27.17	31.25
33.4	18.36
26.7	30.26
27.99	19.95
25.65	28.46
40.51	27.05
34.89	26.2
32.51	22.89
27.65	22.95
32.57	23.36
30.19	28.43
24.42
