# Supplementary material for: Progressive overfilling of readily releasable pool underlies short-term facilitation at recurrent excitatory synapses in layer 2/3 of the rat prefrontal cortex
Source: eLife. 2026 Feb 18;14:RP102923. doi: 10.7554/eLife.102923 (PMC12890252; doi:10.7554/eLife.102923)
Supplement: Figure 3—figure supplement 3—source data 1. [file elife-102923-fig3-figsupp3-data1.xlsx]

## Sheet: elevCa
ppr		epsc
1.3	2.5	1.3	2.5
0.566534	0.557592	31.243	66.6535
0.098425	0.005064	33.3486	40.979
0.362602	0.319474	55.4127	40.8458
0.111485	0.011904	42.4294	49.2622
0.052532	0.032934	56.2345	73.4317
0.113479	0.031327	40.8136	44.9891
0.742086	0.670158	19.7567	36.4485
0.119325	0.129345	19.1485	15.0058

## Sheet: egta preincub
ppr		epsc
1.3	2.5	1.3	2.5
0.22001	0.157136	20.3266	28.0681
0.496591	0.28731	30.2768	37.9832
0.17977	0.225528	12.5452	12.2184
0.030131	0.036847	45.0857	49.9013
0.135425	-0.00279	32.8194	28.4689
0.154174	0.273695	56.0433	56.8882
0.332992	0.434444	32.3397	27.4639
0.357865	0.274747	35.5444	23.9656
0.287947	0.427656	33.8823	21.759
0.501774	0.518	31.1759	25.5273
0.254455	0.445977	33.9363	39.7078
0.219512	0.114928	54.4794	39.1259
0.222964	0.206786	32.5055	22.4047
0.312902	0.331593	30.0275	27.3398
-0.00153	-0.00928	22.6885	20.893
0.190889	0.141538	28.6446	27.8754
0.111073	-0.02959	22.1244	27.7885
0.076978	0.012591	22.5125	22.7346
0.142375	0.25764	28.7011	35.477
0.339036	0.28579	25.2335	27.1384
