# Supplementary material for: Progressive overfilling of readily releasable pool underlies short-term facilitation at recurrent excitatory synapses in layer 2/3 of the rat prefrontal cortex
Source: eLife. 2026 Feb 18;14:RP102923. doi: 10.7554/eLife.102923 (PMC12890252; doi:10.7554/eLife.102923)
Supplement: Figure 3—source data 1. [file elife-102923-fig3-data1.xlsx]

## Sheet: ee
d01s	sem	d02s	sem	d05s	sem	d1s	sem	d2s	sem	d5s	sem	d10s	sem
1	0	1	0	1	0	1	0	1	0	1	0	1	0
0.324328	0.0572013	0.441425	0.0964649	0.406573	0.0519442	0.369751	0.0605812	0.417411	0.11259	0.361789	0.0730678	0.403122	0.0696529
0.428845	0.0609347	0.540345	0.118564	0.549625	0.071353	0.393993	0.0545627	0.341317	0.0708478	0.53723	0.0757347	0.525885	0.119106
0.544547	0.0629767	0.670088	0.159257	0.82472	0.0998611	0.530165	0.0719531	0.537299	0.0939737	0.598212	0.0831454	0.622096	0.0685918
0.709158	0.0814093	0.614093	0.118615	0.879926	0.0857304	0.749809	0.0856016	0.653818	0.0836584	0.861284	0.0864917	0.643727	0.08525
0.864444	0.180816	0.745502	0.129454	1.03728	0.109781	0.689142	0.0797547	0.817845	0.135204	0.8881	0.110616	0.701148	0.0909583
0.994012	0.123976	0.949826	0.14243	1.12442	0.0957783	0.975721	0.108349	0.932483	0.136169	1.00204	0.124252	0.879667	0.127053
1.03397	0.103769	1.01331	0.0931295	1.05909	0.109164	0.999121	0.137252	1.07207	0.196022	1.00718	0.123023	0.956491	0.137408
1.05292	0.151975	1.07805	0.095366	1.21906	0.0982456	1.2975	0.171819	1.12297	0.186573	1.14838	0.119903	1.04986	0.106892
1.16692	0.191589	1.25093	0.190051	1.45454	0.120882	1.21759	0.188644	1.17718	0.180376	1.16731	0.131711	1.10521	0.184146
1.31463	0.123819	1.14118	0.126288	1.32996	0.141958	1.28853	0.165307	1.19694	0.141919	1.15653	0.127621	1.10543	0.202176
1.31022	0.17307	1.42569	0.21966	1.30727	0.102388	1.24441	0.187877	1.30325	0.190843	1.22812	0.15234	1.23926	0.213975
1.24488	0.120775	1.15731	0.147569	1.32923	0.117781	1.32196	0.175537	1.13358	0.211049	1.30344	0.125709	1.27811	0.255561
1.36525	0.229296	1.54401	0.268999	1.30127	0.102712	1.3062	0.183678	1.39266	0.225797	1.23872	0.155595	1.23317	0.186184
1.29724	0.14933	1.54572	0.191446	1.32749	0.126414	1.45513	0.221098	1.46256	0.220619	1.07247	0.1437	1.24085	0.224265
1.33961	0.208473	1.53607	0.231064	1.24254	0.099365	1.44435	0.215756	1.47375	0.251807	1.07581	0.141967	1.20862	0.179406
1.40165	0.186997	1.39225	0.183391	1.34121	0.105951	1.41828	0.196669	1.45603	0.316391	1.25042	0.164055	1.28948	0.234288
1.30312	0.201483	1.48828	0.178445	1.30117	0.104405	1.36979	0.214276	1.38552	0.278549	1.13503	0.138734	1.36808	0.278421
1.23288	0.21562	1.40684	0.209336	1.28323	0.118598	1.12261	0.209638	1.47103	0.23631	1.18218	0.137804	1.34546	0.258296
1.29118	0.227631	1.41538	0.208325	1.28319	0.121124	1.2096	0.184413	1.59215	0.271455	1.17612	0.148238	1.34852	0.28459
1.24566	0.198449	1.29599	0.156949	1.36591	0.146043	1.26999	0.214274	1.49896	0.334995	1.16312	0.14927	1.25096	0.30041
1.56638	0.188196	1.44342	0.207583	1.21004	0.102265	1.26049	0.193999	1.35548	0.179596	1.06637	0.145391	1.12227	0.222887
1.34516	0.262809	1.42717	0.208215	1.19775	0.0829826	1.28231	0.211854	1.41155	0.225772	1.06306	0.130918	1.14838	0.247237
1.26976	0.183166	1.36555	0.197828	1.24974	0.129179	1.24531	0.171002	1.30498	0.229701	1.07903	0.150277	1.33395	0.379609
1.1888	0.174026	1.33826	0.179108	1.26391	0.130802	1.18151	0.171757	1.19969	0.208014	1.07129	0.153822	1.12666	0.196183
1.30515	0.21058	1.36446	0.157968	1.07239	0.0950531	1.08943	0.155472	1.40911	0.433313	1.07002	0.138689	1.19467	0.290755
1.07422	0.170183	1.24976	0.230582	1.17879	0.124259	1.13219	0.154166	1.40178	0.368947	1.02558	0.140331	1.17128	0.26906
1.24759	0.161128	1.15263	0.190487	1.01629	0.0979977	1.09939	0.165188	1.42474	0.319862	1.01591	0.130566	1.25818	0.305771
1.25179	0.197561	1.08944	0.187549	1.10289	0.0833539	1.0745	0.170021	1.34753	0.452129	1.0534	0.15929	1.06317	0.293058
1.17066	0.150612	1.21224	0.15554	1.04697	0.0940517	1.08857	0.177378	1.17804	0.190542	0.886516	0.10832	1.00009	0.220204
2.38835	0.34255	2.58306	0.284862	2.11216	0.144167	2.00022	0.203597	1.67434	0.164102	1.58787	0.10075	1.4344	0.126127
0.511238	0.0695542	0.650543	0.131017	0.579049	0.0715725	0.341417	0.0797439	0.361843	0.0683154	0.335846	0.0754948	0.382875	0.0843961
0.945548	0.145675	0.858527	0.138611	0.944157	0.119103	0.626447	0.105506	0.42729	0.0970085	0.539534	0.0998182	0.492224	0.135185
1.13296	0.205953	1.35402	0.210974	1.17091	0.112797	0.848466	0.103273	0.578178	0.105039	0.654824	0.0879446	0.521716	0.0805875
1.24761	0.231365	1.33067	0.269581	1.23713	0.0971398	0.850929	0.100373	0.69095	0.116509	0.641959	0.102868	0.663797	0.107501
1.11727	0.219314	1.1796	0.171052	1.11542	0.0951364	1.04429	0.138123	0.870276	0.137062	0.872173	0.122549	0.611184	0.0944524
1.02969	0.155401	1.27086	0.256847	1.31254	0.0954203	1.20161	0.186374	1.03434	0.173964	0.796247	0.0968539	0.682144	0.107933
0.964259	0.130659	1.26434	0.152066	1.09437	0.111442	1.09502	0.172529	0.98921	0.142244	0.917654	0.112501	0.83437	0.149467
1.01794	0.123868	1.24604	0.214682	1.20045	0.117803	1.23712	0.196719	1.00585	0.217938	0.965225	0.137224	0.92903	0.130947
0.97948	0.219866	1.24919	0.22827	1.15125	0.0841488	1.17335	0.18661	1.14965	0.19062	0.901001	0.0790232	1.09187	0.182051
0.950653	0.149714	1.00426	0.15155	1.11609	0.0928059	1.16193	0.214731	1.17253	0.192139	0.947334	0.0987254	0.914343	0.128422
0.868565	0.173051	0.943037	0.184064	0.906849	0.0889352	1.14753	0.2104	1.15111	0.218534	1.02639	0.122423	1.13	0.163305
0.926876	0.189943	0.88657	0.187278	0.971955	0.0919089	1.19565	0.189451	1.16153	0.184826	1.10207	0.185801	1.08125	0.198837
0.954197	0.221332	0.858812	0.154837	0.972269	0.139123	1.12892	0.182356	1.30635	0.21566	1.12104	0.173506	0.944923	0.175616
0.827009	0.136569	0.990917	0.171475	0.989304	0.100573	1.04458	0.15001	1.29609	0.271097	0.994029	0.127018	1.09608	0.230888
0.880518	0.193951	1.0175	0.170592	0.858213	0.089794	0.912115	0.124904	1.10144	0.187148	1.19587	0.136008	1.10396	0.169529
0.667477	0.12516	0.868905	0.145936	0.802504	0.0786602	0.970245	0.154652	1.12333	0.185958	1.09389	0.163878	1.13714	0.222713
0.843323	0.193759	0.793444	0.140263	0.787281	0.0983775	1.07633	0.165407	1.25712	0.222453	1.05602	0.137635	1.15931	0.184281
0.678868	0.161831	0.937714	0.155246	0.799233	0.106881	1.00067	0.179501	1.16713	0.236651	1.1046	0.125717	1.15433	0.214797
0.771386	0.146652	0.798922	0.112514	0.768351	0.0752865	0.899824	0.127894	1.10339	0.180833	1.03777	0.131582	1.2052	0.223086
0.582066	0.0711661	0.889678	0.129351	0.799395	0.0938275	0.942809	0.149993	1.16543	0.295869	1.07621	0.144728	1.09014	0.212813
0.762389	0.156101	0.812549	0.13553	0.831415	0.0810768	0.961068	0.161433	0.998999	0.148245	0.930232	0.113179	1.03263	0.225037
0.640028	0.0864782	0.820714	0.146185	0.702487	0.0677269	0.873497	0.13371	1.21524	0.282741	0.999	0.132113	1.16034	0.261964
0.673465	0.0969527	0.899475	0.191997	0.7543	0.0480755	0.833382	0.12431	1.20058	0.290147	0.924196	0.129406	1.12493	0.28696
0.58119	0.100289	0.863392	0.186844	0.825466	0.139036	0.799343	0.131593	1.02597	0.297348	1.00753	0.128568	1.16774	0.268752
0.710476	0.161327	0.93446	0.209846	0.647187	0.0677264	0.892061	0.144046	1.19301	0.372822	0.948652	0.129687	1.32371	0.335885
0.746721	0.17858	0.846283	0.164898	0.69779	0.0614141	0.860807	0.136527	1.10966	0.276912	0.899898	0.126497	1.18868	0.335273
0.59269	0.133979	0.572701	0.0894413	0.631579	0.0573384	0.750012	0.132735	1.02509	0.283727	0.829394	0.103592	1.13996	0.252838
0.843234	0.153462	0.736278	0.115251	0.659779	0.0872033	0.809238	0.139904	0.967111	0.168221	0.907901	0.130492	1.32963	0.396754
0.676803	0.116725	0.810969	0.17703	0.731068	0.0967304	0.729615	0.130777	0.91568	0.211084	0.890022	0.100154	1.08836	0.247061

## Sheet: ie
d01s	sem	d02s	sem	d05s	sem	d1s	sem	d2s	sem	d5s	sem	d10s	sem
1	0	1	0	1	0	1	0	1	0	1	0	1	0
0.293867	0.0549378	0.422843	0.0950092	0.412651	0.0939483	0.347329	0.0632552	0.59295	0.194141	0.324507	0.116923	0.362665	0.0796211
0.51539	0.203328	0.559817	0.106598	0.536774	0.0970249	0.512992	0.123795	0.438055	0.105568	0.376511	0.0534665	0.367	0.0520788
0.654506	0.156451	0.669312	0.103183	0.592768	0.134912	0.542775	0.120033	0.67312	0.128743	0.470097	0.219401	0.438979	0.133734
0.666926	0.112773	0.830008	0.138464	0.755757	0.0779807	0.558938	0.12281	0.69901	0.103423	0.411693	0.0947656	0.48843	0.137998
0.745191	0.20967	0.717038	0.112165	0.634736	0.0969836	0.634316	0.127014	0.622399	0.132042	0.441364	0.0893945	0.59506	0.135789
0.606248	0.0991304	0.71666	0.0976149	0.62205	0.108203	0.592608	0.132243	0.787807	0.106466	0.574193	0.120997	0.6688	0.0744099
0.813782	0.146518	0.653942	0.0915119	0.739236	0.106649	0.663147	0.0662669	0.599859	0.112621	0.517115	0.116846	0.782126	0.147517
0.640815	0.121125	0.689312	0.101297	0.83342	0.130007	0.655956	0.0825323	0.708616	0.124218	0.662902	0.119819	0.774707	0.12718
0.841501	0.233814	0.695361	0.0852537	0.768378	0.0988221	0.549451	0.0667325	0.716416	0.124061	0.671642	0.177268	0.62765	0.105615
0.925946	0.175287	0.690284	0.0832807	0.729273	0.0907813	0.622453	0.121124	0.613962	0.0898597	0.67749	0.286655	0.740273	0.110169
0.888102	0.185945	0.681956	0.136884	0.753952	0.0954143	0.565543	0.109519	0.593682	0.141746	0.641616	0.203405	0.893674	0.114758
1.0006	0.188513	0.592792	0.0557781	0.616735	0.100601	0.558873	0.0575771	0.704103	0.117164	0.692	0.166639	0.908461	0.120787
0.765461	0.136211	0.534976	0.0553195	0.705986	0.0849578	0.670549	0.163906	0.605026	0.12147	0.706627	0.136182	1.06506	0.132994
0.897318	0.198297	0.76361	0.11006	0.652941	0.0748446	0.624682	0.0706493	0.659922	0.122666	0.451091	0.0711407	0.899681	0.162515
0.791789	0.173051	0.692458	0.0857743	0.751771	0.152916	0.61468	0.0741283	0.692782	0.135582	0.689515	0.159415	0.949554	0.124402
0.817919	0.146529	0.581323	0.0909845	0.667617	0.0906583	0.57499	0.0614372	0.554679	0.0952874	0.764123	0.169617	1.03859	0.178106
0.801788	0.13697	0.584663	0.0557817	0.637623	0.104153	0.590693	0.091089	0.488841	0.0639813	0.780216	0.1735	0.900773	0.128896
0.771587	0.129582	0.597199	0.0439204	0.748396	0.103025	0.591028	0.093573	0.55303	0.0952205	0.710193	0.155335	0.903494	0.117528
0.817166	0.190891	0.605252	0.102014	0.6267	0.103273	0.548584	0.0888736	0.540662	0.0985622	0.721231	0.147794	0.897247	0.0985505
0.717167	0.148261	0.556907	0.0786334	0.587332	0.0783947	0.536572	0.0706485	0.545983	0.0756408	0.997385	0.177385	0.779558	0.089606
0.861565	0.147211	0.597606	0.0858401	0.683898	0.0887216	0.50698	0.0705097	0.498722	0.0522847	0.814278	0.153427	0.722728	0.12508
0.759066	0.101613	0.643767	0.0832481	0.637617	0.101235	0.508996	0.0773904	0.487722	0.0495	0.613508	0.132529	0.797151	0.14991
0.665961	0.0805718	0.588124	0.0717808	0.654166	0.139339	0.524895	0.059088	0.643105	0.121895	0.79468	0.155426	0.749463	0.132505
0.953436	0.200503	0.554938	0.082655	0.620357	0.0782429	0.408161	0.0456753	0.506118	0.107343	0.577933	0.167615	0.678707	0.0972125
0.741205	0.101507	0.550966	0.0874187	0.543211	0.0760186	0.435211	0.0884526	0.512532	0.0710615	0.71251	0.211044	0.892499	0.144923
0.940716	0.134159	0.576877	0.075828	0.615261	0.117358	0.460265	0.061214	0.518606	0.101188	0.725012	0.14711	0.895143	0.17205
0.595454	0.102279	0.476822	0.0712793	0.590302	0.128381	0.55068	0.0658866	0.486393	0.0822315	0.607493	0.151052	0.730011	0.124184
0.731183	0.105216	0.518962	0.0679142	0.574537	0.073882	0.439276	0.0886954	0.51694	0.092989	0.67203	0.137125	0.699058	0.108159
0.700146	0.0852176	0.405699	0.0676212	0.507558	0.0836677	0.347419	0.0419838	0.360256	0.0501041	0.703747	0.158821	0.763472	0.183508
1.99102	0.329243	1.69894	0.15666	1.65611	0.205914	1.53453	0.12465	1.67787	0.207585	1.4578	0.212732	1.29942	0.120602
0.413744	0.0730907	0.539461	0.0979883	0.544012	0.108488	0.355381	0.0921831	0.442287	0.133648	0.349335	0.118066	0.365832	0.0643879
0.915465	0.166119	0.601543	0.0933787	0.783044	0.147289	0.548211	0.114433	0.640077	0.19069	0.396659	0.0934558	0.314821	0.0533508
0.835642	0.120432	0.62867	0.12031	0.624819	0.114019	0.580304	0.137808	0.608329	0.151304	0.487448	0.135999	0.55851	0.0747717
0.807934	0.0938776	0.712724	0.090391	0.831864	0.136652	0.621697	0.110523	0.594588	0.132495	0.392401	0.0832388	0.415749	0.0685055
0.715996	0.159275	0.657814	0.120093	0.621642	0.0744871	0.620512	0.108278	0.617822	0.100744	0.56951	0.160213	0.538259	0.0655565
0.802671	0.135842	0.388808	0.0638816	0.662787	0.107072	0.50523	0.0750886	0.600975	0.160682	0.636566	0.123834	0.559407	0.0807662
0.734304	0.194605	0.554009	0.111947	0.558877	0.0818581	0.622637	0.153752	0.536149	0.128994	0.57413	0.120168	0.642253	0.131532
0.705349	0.156039	0.421288	0.0455468	0.687441	0.0981278	0.474852	0.0635794	0.62949	0.103755	0.582725	0.10186	0.60403	0.102149
0.671907	0.09008	0.604494	0.104205	0.61749	0.116744	0.415759	0.0600462	0.655953	0.107842	0.546398	0.127569	0.691385	0.0561998
0.715697	0.125378	0.450727	0.0670412	0.613857	0.107046	0.546238	0.0893588	0.615371	0.131201	0.552706	0.150021	0.903567	0.159963
0.704503	0.104146	0.383502	0.0834182	0.632531	0.0751521	0.438755	0.0434094	0.528547	0.095141	0.654308	0.116679	0.788673	0.103047
0.62904	0.113778	0.48625	0.0790553	0.542021	0.0875604	0.458413	0.074785	0.667718	0.122154	0.684302	0.0789162	0.88215	0.183492
0.590063	0.0782615	0.394882	0.0834705	0.510875	0.101863	0.409479	0.0566247	0.542851	0.136636	0.675875	0.139641	0.760985	0.124859
0.705275	0.137113	0.413913	0.0727878	0.565738	0.0803792	0.393676	0.0462665	0.494149	0.0994517	0.565659	0.0981973	0.788072	0.123307
0.650483	0.157221	0.413987	0.0868529	0.553519	0.087143	0.327571	0.0342832	0.59825	0.148043	0.680019	0.151142	0.615479	0.0914421
0.5227	0.0716999	0.445067	0.108737	0.550466	0.0966392	0.362867	0.0402281	0.543959	0.165579	0.570029	0.101747	0.841029	0.113286
0.53748	0.0886127	0.414555	0.0778321	0.546938	0.101047	0.39648	0.0744333	0.489379	0.111062	0.779933	0.172937	0.762482	0.117514
0.556892	0.145631	0.369844	0.0691523	0.4727	0.0785827	0.392884	0.0849754	0.473138	0.0818285	0.776728	0.163783	0.669387	0.145743
0.538398	0.0948766	0.348532	0.0655753	0.49089	0.0898387	0.349007	0.0881179	0.466087	0.0789409	0.7702	0.207965	0.791184	0.13355
0.603769	0.0969653	0.388165	0.100373	0.519923	0.0641095	0.384967	0.0714525	0.431305	0.0809805	0.686091	0.126649	0.949848	0.15045
0.545484	0.0926928	0.391676	0.0963078	0.484564	0.0970715	0.39849	0.0373485	0.487995	0.0879052	0.700094	0.115018	0.905414	0.176665
0.663109	0.159966	0.37515	0.0897377	0.544355	0.0629671	0.32634	0.0625625	0.417058	0.0627856	0.709934	0.141381	0.645034	0.100343
0.56281	0.140814	0.428289	0.115397	0.502127	0.084757	0.438626	0.0750049	0.398752	0.0362153	0.525157	0.0750028	0.931921	0.157236
0.48677	0.111725	0.446157	0.116138	0.557742	0.0998177	0.379674	0.0713642	0.408589	0.0796258	0.656651	0.115049	0.983046	0.127069
0.433172	0.0846067	0.350584	0.0618627	0.465642	0.0945113	0.315326	0.064923	0.45878	0.059218	0.49609	0.134799	0.803971	0.156746
0.477414	0.132246	0.346621	0.0911913	0.406997	0.080244	0.359256	0.0504489	0.462965	0.0542537	0.744814	0.124404	0.751825	0.120321
0.531729	0.132403	0.323414	0.0685464	0.598103	0.0705636	0.315852	0.0661556	0.464718	0.0959164	0.609701	0.153073	0.68119	0.141934
0.533294	0.100303	0.259917	0.0443917	0.490687	0.0614533	0.352017	0.0962775	0.407881	0.0654406	0.742402	0.194204	0.775303	0.160439
0.591147	0.169766	0.378663	0.109188	0.473554	0.0696429	0.290289	0.0688557	0.355141	0.0550396	0.680088	0.0709827	0.956488	0.1587
