# Supplementary material for: Progressive overfilling of readily releasable pool underlies short-term facilitation at recurrent excitatory synapses in layer 2/3 of the rat prefrontal cortex
Source: eLife. 2026 Feb 18;14:RP102923. doi: 10.7554/eLife.102923 (PMC12890252; doi:10.7554/eLife.102923)
Supplement: Figure 3—source data 2. [file elife-102923-fig3-data2.xlsx]

## Sheet: ee
mean(5 Hz)	var(5 Hz)	mean(40 Hz & PTA)	var(40 Hz & PTA)
42.9523	724.891	34.1661	694.993
44.3951	631.216	12.3969	275.096
54.9588	818.32	13.5062	276.658
57.6418	765.253	18.4008	421.668
61.8656	771.574	23.9717	494.537
67.6778	813.007	25.8033	490.417
68.2797	933.425	32.2248	628.705
71.2548	1158.54	32.6136	684.043
74.7688	1068.27	36.1066	736.689
78.2049	587.653	37.8206	774.435
76.5025	590.513	39.7555	741.043
81.725	641.247	42.2014	741.865
78.5963	670.508	39.457	688.655
80.0318	526.677	42.3561	733.505
80.8295	1003.01	42.7793	789.184
81.5084	935.235	42.896	799.964
81.3565	649.182	43.031	672.656
82.4728	726.34	42.578	729.318
79.6565	875.851	40.1334	687.578
86.075	982.85	42.7714	832.605
		41.7437	773.922
		41.8575	743.906
		40.666	706.233
		40.5021	631.553
		37.6587	637.057
		37.8686	692.928
		34.6438	539.717
		35.6933	695.355
		35.8417	715.441
		33.2762	651.771
		77.1667	819.449
		84.7977	821.286
		69.4316	794.392

## Sheet: ie
mean(5 Hz)	var(5 Hz)	mean(40 Hz & PTA)	var(40 Hz & PTA)
56.7972	1288.78	73.4338	1992.42
61.8346	1423.38	23.2406	840.626
63.1909	1344.03	28.0518	865.433
72.6312	1830.95	36.4918	1577.34
74.3963	2000.53	40.8175	1399.81
76.1855	1632.7	40.8362	1270
68.2846	1759.65	42.4001	1239.38
69.7837	1712.71	38.9933	1452.99
85.3641	1835.28	40.3615	1026.86
88.4497	1827.16	42.3761	1429.4
84.4147	2045.24	43.9642	1396.01
83.0665	1285.52	39.032	1202.31
88.0544	2213.55	41.1438	1182
87.2253	1753.6	40.0261	1087.25
77.9391	2394.58	39.8452	972.394
93.4689	1405.24	41.2166	1039.37
92.6147	1887.18	36.2629	958.442
87.68	2256.12	36.9438	1371.2
96.4047	1615.62	37.0743	1145.56
90.622	2101.57	36.9508	1003.26
		36.519	1202.19
		38.0809	1141.19
		35.415	936.647
		39.5656	1108.44
		36.782	1102.3
		32.5402	996.25
		36.7554	974.604
		33.3094	1034.18
		31.4787	948.028
		27.3872	813.245
		101.501	2106.07
		114.363	1137.43
		95.9236	2233
