# Supplementary material for: Progressive overfilling of readily releasable pool underlies short-term facilitation at recurrent excitatory synapses in layer 2/3 of the rat prefrontal cortex
Source: eLife. 2026 Feb 18;14:RP102923. doi: 10.7554/eLife.102923 (PMC12890252; doi:10.7554/eLife.102923)
Supplement: Figure 4—source data 1. [file elife-102923-fig4-data1.xlsx]

## Sheet: U73
ctrl	sem	U73	sem
1	0	1	0
0.483635	0.072273	0.336187	0.07715
0.622411	0.061674	0.340982	0.0881332
0.82336	0.0970295	0.514687	0.0580823
1.07959	0.154274	0.708442	0.0793836
1.14019	0.119828	0.764041	0.129244
1.397	0.164071	0.769315	0.134336
1.292	0.182108	0.905522	0.124534
1.50995	0.200748	1.00541	0.126197
1.57727	0.177934	0.884256	0.156569
1.45434	0.226992	1.13058	0.250946
1.47492	0.233267	1.06839	0.185519
1.5255	0.175577	1.21114	0.206974
1.53176	0.184082	0.916863	0.155551
1.56117	0.216969	1.07444	0.225962
1.31079	0.172565	0.992525	0.138754
1.50843	0.237358	0.985293	0.18714
1.39755	0.165912	1.19032	0.266593
1.52678	0.250371	0.98065	0.172155
1.44056	0.232085	0.979655	0.152584
1.34476	0.120455	0.920175	0.100492
1.37062	0.100433	0.975025	0.160254
1.30058	0.147109	0.985369	0.191061
1.34707	0.141664	1.1253	0.268504
1.34639	0.185598	0.846763	0.0560727
1.24912	0.174307	1.03266	0.211849
1.19436	0.163783	0.860766	0.191146
1.32216	0.135757	0.792779	0.126712
1.20694	0.138726	0.951598	0.16398
1.18562	0.147747	0.872513	0.130166
2.32725	0.2242	1.75579	0.185148
0.728205	0.0704025	0.365326	0.0614832
0.983873	0.118251	0.458536	0.0312271
1.26297	0.101521	0.774025	0.149735
1.36016	0.162034	0.80739	0.149067
1.41417	0.149465	0.929448	0.163283
1.30998	0.181481	0.874549	0.138327
1.58692	0.295856	0.874069	0.154322
1.21393	0.201446	0.83687	0.141105
1.13633	0.172257	0.878958	0.161067
1.03834	0.204073	0.739176	0.11787
1.13484	0.147675	0.847973	0.234965
0.975162	0.119398	0.863295	0.187046
0.976945	0.13618	0.764693	0.119347
1.16169	0.0772154	0.767644	0.122592
1.04384	0.234253	0.84694	0.115646
1.11684	0.167976	0.578139	0.0940936
1.0852	0.276318	0.782261	0.133104
0.989925	0.125276	0.742945	0.146235
0.825961	0.108635	0.60757	0.0519118
0.908892	0.139987	0.579082	0.0919927
0.790703	0.120921	0.639498	0.0898671
0.753818	0.086632	0.532631	0.0475178
0.884271	0.0885743	0.631226	0.125672
0.898601	0.180999	0.597921	0.0899584
0.903605	0.134488	0.60953	0.141965
0.759652	0.0937768	0.508005	0.0851854
0.617214	0.0597653	0.459738	0.0533169
0.766517	0.111876	0.568348	0.0983951
0.910994	0.1458	0.550039	0.14215

## Sheet: OAG
ctrl	sem	OAG	sem
1	0	1	0
0.34101	0.0727286	0.317857	0.0761536
0.439263	0.0862116	0.34939	0.0839752
0.816116	0.18627	0.440434	0.0738266
1.05423	0.251912	0.534308	0.0888718
1.17337	0.201858	0.622173	0.0931186
1.36526	0.230518	0.718518	0.109316
1.58602	0.216611	0.793268	0.111559
1.49165	0.22526	0.836056	0.123432
1.66056	0.245838	0.821884	0.130036
1.652	0.225698	0.886104	0.0999344
1.56645	0.161865	0.936957	0.104017
1.61727	0.247451	0.945227	0.123895
1.52129	0.170087	0.90936	0.117755
1.49503	0.156289	0.962007	0.12113
1.40626	0.170634	0.930877	0.107434
1.44849	0.200616	0.869738	0.113145
1.33246	0.133755	0.841364	0.0925903
1.45475	0.124339	0.798496	0.0770977
1.28556	0.137553	0.853509	0.0869541
1.39478	0.142861	0.819582	0.100094
1.16716	0.139152	0.816927	0.101582
1.27084	0.131843	0.88814	0.140086
1.30782	0.143356	0.758475	0.114457
1.20552	0.121043	0.736537	0.114891
1.07671	0.125437	0.72391	0.10647
1.07166	0.125387	0.693723	0.112337
1.13032	0.146932	0.736751	0.118488
1.04022	0.122158	0.694815	0.120335
1.00065	0.112759	0.73564	0.104108
2.30707	0.13991	1.42081	0.123643
0.618483	0.110903	0.391841	0.0934846
1.2453	0.24038	0.562941	0.113373
1.53855	0.224978	0.788313	0.110919
1.56593	0.211935	0.789924	0.117436
1.60783	0.168895	0.774289	0.113488
1.52727	0.184511	0.772208	0.112494
1.35681	0.139133	0.766116	0.104843
1.26118	0.188118	0.731986	0.099178
1.05774	0.0963061	0.745958	0.119699
1.08588	0.139879	0.763448	0.138103
1.12805	0.102798	0.720076	0.123854
1.06185	0.117963	0.662989	0.107925
1.04181	0.110912	0.612216	0.108142
1.0406	0.179525	0.609625	0.0882158
0.833653	0.113079	0.615895	0.0942526
0.781052	0.113464	0.615042	0.111205
0.834696	0.12138	0.540945	0.0757872
0.79197	0.0966406	0.564135	0.123147
0.828751	0.15771	0.535606	0.0988475
0.910975	0.123475	0.525007	0.0711945
0.790663	0.127938	0.515625	0.119485
0.719295	0.10266	0.533887	0.100569
0.757892	0.121055	0.451999	0.101084
0.813951	0.118138	0.488538	0.0931594
0.709493	0.120088	0.470193	0.100329
0.721274	0.104062	0.473128	0.0896049
0.80541	0.0933006	0.413364	0.0777956
0.702422	0.125899	0.456518	0.103841
0.712636	0.102308	0.411016	0.0836934

## Sheet: Dyna
ctrl	sem	Dyna	sem
1	0	1	0
0.406573	0.0519442	0.475125	0.0540092
0.549625	0.071353	0.62995	0.0895347
0.82472	0.0998611	0.650962	0.10673
0.879926	0.0857304	1.02143	0.110965
1.03728	0.109781	0.945243	0.13434
1.12442	0.0957783	1.10853	0.147378
1.05909	0.109164	1.11321	0.147181
1.21906	0.0982456	1.14642	0.0973382
1.45454	0.120882	1.21166	0.196419
1.32996	0.141958	1.19164	0.184096
1.30727	0.102388	1.06148	0.223643
1.32923	0.117781	0.957929	0.128769
1.30127	0.102712	1.03734	0.180702
1.32749	0.126414	1.17165	0.178818
1.24254	0.099365	0.927057	0.129815
1.34121	0.105951	0.951854	0.0898275
1.30117	0.104405	1.09651	0.150185
1.28323	0.118598	0.752196	0.0817589
1.28319	0.121124	0.803334	0.170938
1.36591	0.146043	0.798075	0.11919
1.21004	0.102265	0.917181	0.127297
1.19775	0.0829826	0.722314	0.153877
1.24974	0.129179	0.83814	0.117222
1.26391	0.130802	0.661067	0.117636
1.07239	0.0950531	0.826961	0.121141
1.17879	0.124259	0.62226	0.0851955
1.01629	0.0979977	0.619077	0.0798674
1.10289	0.0833539	0.625609	0.118403
1.04697	0.0940517	0.685698	0.110165
2.11216	0.144167	1.48521	0.116311
0.579049	0.0715725	0.701119	0.0772883
0.944157	0.119103	0.765805	0.0858551
1.17091	0.112797	0.96746	0.148977
1.23713	0.0971398	0.873793	0.132027
1.11542	0.0951364	0.878651	0.104217
1.31254	0.0954203	0.88662	0.158241
1.09437	0.111442	0.771727	0.117126
1.20045	0.117803	0.902559	0.127867
1.15125	0.0841488	0.83875	0.166368
1.11609	0.0928059	0.700052	0.168457
0.906849	0.0889352	0.696662	0.113818
0.971955	0.0919089	0.595925	0.114622
0.972269	0.139123	0.598018	0.126046
0.989304	0.100573	0.593412	0.0695
0.858213	0.089794	0.744381	0.171693
0.802504	0.0786602	0.575932	0.0827882
0.787281	0.0983775	0.713988	0.121851
0.799233	0.106881	0.60665	0.0827008
0.768351	0.0752865	0.723016	0.10915
0.799395	0.0938275	0.585909	0.12986
0.831415	0.0810768	0.51297	0.125223
0.702487	0.0677269	0.595078	0.115446
0.7543	0.0480755	0.557322	0.1203
0.825466	0.139036	0.565032	0.10842
0.647187	0.0677264	0.591286	0.152192
0.69779	0.0614141	0.56156	0.0860247
0.631579	0.0573384	0.456295	0.124135
0.659779	0.0872033	0.514531	0.133018
0.731068	0.0967304	0.505969	0.0967885

## Sheet: LatB
ctrl	sem	LatB	sem
1	0	1	0
0.406573	0.0519442	0.637095	0.0741143
0.549625	0.071353	0.855808	0.105867
0.82472	0.0998611	0.936993	0.089734
0.879926	0.0857304	1.1074	0.0895764
1.03728	0.109781	1.11209	0.10018
1.12442	0.0957783	1.10635	0.0695045
1.05909	0.109164	1.0652	0.0737941
1.21906	0.0982456	1.16684	0.0794504
1.45454	0.120882	1.1023	0.0861019
1.32996	0.141958	1.07048	0.0674179
1.30727	0.102388	1.08024	0.0710231
1.32923	0.117781	1.0642	0.0864395
1.30127	0.102712	1.02184	0.0855859
1.32749	0.126414	0.991831	0.0736659
1.24254	0.099365	0.983866	0.0841619
1.34121	0.105951	0.954391	0.0884506
1.30117	0.104405	0.925658	0.0766693
1.28323	0.118598	0.867784	0.0712512
1.28319	0.121124	0.887911	0.0796024
1.36591	0.146043	0.91197	0.0621441
1.21004	0.102265	0.847961	0.0711048
1.19775	0.0829826	0.821665	0.0724692
1.24974	0.129179	0.812301	0.0601647
1.26391	0.130802	0.812197	0.0779055
1.07239	0.0950531	0.824174	0.0873613
1.17879	0.124259	0.815981	0.0708415
1.01629	0.0979977	0.745101	0.0722327
1.10289	0.0833539	0.76064	0.067588
1.04697	0.0940517	0.721957	0.0850589
2.11216	0.144167	1.46021	0.0761973
0.579049	0.0715725	0.726023	0.100192
0.944157	0.119103	0.978075	0.076003
1.17091	0.112797	1.08022	0.0781518
1.23713	0.0971398	1.09572	0.0931407
1.11542	0.0951364	0.927899	0.0991132
1.31254	0.0954203	0.931824	0.0794395
1.09437	0.111442	0.969	0.0777111
1.20045	0.117803	0.86236	0.0948699
1.15125	0.0841488	0.814005	0.0790835
1.11609	0.0928059	0.764428	0.0825161
0.906849	0.0889352	0.759248	0.0780221
0.971955	0.0919089	0.760964	0.068617
0.972269	0.139123	0.701309	0.0769975
0.989304	0.100573	0.688252	0.0626338
0.858213	0.089794	0.660035	0.0750484
0.802504	0.0786602	0.620708	0.0571614
0.787281	0.0983775	0.641497	0.0626306
0.799233	0.106881	0.696459	0.0742504
0.768351	0.0752865	0.604275	0.0675914
0.799395	0.0938275	0.567751	0.0643341
0.831415	0.0810768	0.602015	0.0572618
0.702487	0.0677269	0.651451	0.0528719
0.7543	0.0480755	0.591168	0.0640711
0.825466	0.139036	0.574289	0.0622707
0.647187	0.0677264	0.600524	0.069502
0.69779	0.0614141	0.592461	0.0692884
0.631579	0.0573384	0.525159	0.0577211
0.659779	0.0872033	0.50379	0.0552801
0.731068	0.0967304	0.517095	0.0509755
