# Supplementary material for: Progressive overfilling of readily releasable pool underlies short-term facilitation at recurrent excitatory synapses in layer 2/3 of the rat prefrontal cortex
Source: eLife. 2026 Feb 18;14:RP102923. doi: 10.7554/eLife.102923 (PMC12890252; doi:10.7554/eLife.102923)
Supplement: Figure 5—figure supplement 2—source data 1. [file elife-102923-fig5-figsupp2-data1.xlsx]

## Sheet: ee
WT										rescue										KD
1	1	1	1	1	1	1	1	1		1	1	1	1	1	1	1				1	1	1	1	1	1	1	1	1	1
1.61341	1.9608	2.78135	2.30478	1.66022	2.27373	1.97417	2.53101	1.79962		1.60076	2.82331	1.54614	1.24165	1.18046	1.49507	1.54979				0.862841	0.5963	0.576744	0.956491	1.08025	0.808078	0.792843	0.37305	0.696609	0.446347
1.51294	1.88986	3.04597	2.34206	1.79211	2.43441	1.91021	3.46223	1.58815		1.37509	3.73518	2.23978	1.6181	1.45179	2.20616	1.99727				0.822739	0.595992	0.727556	1.27711	1.42881	1.00198	0.753768	0.525063	0.624474	0.400607
1.5087	1.66552	3.20925	2.38285	1.72147	3.11851	2.03408	3.23349	1.65308		1.68343	3.06301	1.64687	1.83309	1.23784	2.13095	2.52955				0.776404	0.598728	0.691642	1.19458	1.54606	1.0028	0.782131	0.625217	0.553141	0.27339
1.58422	1.42985	2.24302	2.29737	1.39866	2.58044	2.15102	2.68261	1.44989		1.29067	3.17755	1.74981	1.88954	1.17644	1.92267	2.232				0.95827	0.605215	0.708459	1.3773	1.43927	0.833832	0.645664	0.732299	0.603557	0.359983
1.42997	1.35213	2.66434	2.04973	1.03559	2.3501	1.94262	3.0399	1.5851		1.1649	2.84944	2.0202	2.17495	1.2523	1.92568	2.66231				0.733399	0.512944	0.70453	1.55532	1.26557	0.882453	0.516248	0.703007	0.64843	0.306129
1.8452	1.47022	2.66414	2.15628	0.803242	2.26858	1.87646	2.76369	1.39868		1.22247	2.89614	1.88398	1.80467	1.23564	2.0604	1.77811				0.795373	0.429739	0.717497	1.47325	1.44968	0.975003	0.575	0.71546	0.769463	0.323535
1.57271	1.28238	1.94867	1.49604	0.65311	2.07465	2.00186	3.16223	1.24648		0.836852	2.5593	2.18444	1.52206	1.13883	1.71957	2.67261				0.760404	0.432084	0.878521	1.4433	1.34145	0.983214	0.540357	0.945586	0.678703	0.294388
1.56635	0.992836	1.80934	1.62806	0.577981	2.00823	1.89284	2.55579	1.49706		0.673079	2.66962	2.25384	2.29007	1.31635	1.9417	2.24199				0.749255	0.594077	0.787674	1.2807	1.35454	0.84826	0.36325	0.838767	0.712552	0.220674
1.30426	1.06934	1.98581	1.40443	0.477131	1.97595	1.67682	2.75337	1.36035		0.784254	2.42027	1.97384	1.7132	1.15704	1.77193	2.49649				0.82426	0.537917	0.589557	1.43539	1.39387	0.826559	0.377107	0.977159	0.985845	0.307998
1.23989	1.00062	2.12136	1.24879	0.37572	1.62545	1.69301	2.43457	1.25585		0.706016	2.88943	2.04974	1.74769	1.29732	1.62712	1.91665				0.650141	0.419578	0.622721	1.38967	1.41609	0.793774	0.186305	0.60829	0.884954	0.243688
1.27461	1.00654	2.14826	1.22076	0.378221	1.39473	1.59171	2.44211	1.42421		0.555469	2.44121	1.89074	1.69521	1.20956	1.70572	2.31593				0.643118	0.417859	0.435213	1.0484	1.43546	0.925737	0.224352	0.544444	0.876015	0.170149
1.29487	0.92202	1.72536	1.25255	0.335899	1.07526	1.60786	2.10063	1.12182		0.880228	2.59691	1.52889	1.47358	1.58941	1.79517	2.21776				0.764603	0.391049	0.0196467	1.26817	1.36076	1.00579	0.30863	0.590136	0.715591	0.267695
1.41385	0.79919	1.64644	1.16962	0.212791	0.715382	1.54017	1.92684	1.27389		1.47897	2.50496	1.50514	1.39041	1.12501	1.61416	2.14287				0.661942	0.388743	0.309317	1.27519	1.44566	1.13037	0.195462	0.731071	0.792645	0.187322
1.17736	0.755666	1.44592	1.24598	0.186238	0.66089	1.27662	1.89728	1.21618		0.672573	2.30793	1.3449	1.20136	0.862378	1.44911	2.17612				0.589326	0.348958	0.443308	1.16093	1.42489	0.920869	0.284198	0.795794	0.698846	0.151195
1.59131	0.750255	1.4219	1.29175	0.214151	0.690451	1.58123	2.05865	1.19752		1.02485	2.43303	1.53361	1.50566	1.05015	1.38443	2.38491				0.82035	0.296667	0.53824	1.15418	1.30276	0.895415	0.275527	0.770185	0.653853	0.161213
1.76084	0.618893	1.078	1.50217	0.141758	0.56123	1.25917	2.01828	1.2874		0.854283	2.18465	1.10859	1.38218	0.915544	1.44751	2.45332				0.682937	0.32844	0.37423	1.17812	1.25795	1.00345	0.219773	0.553478	0.858376	0.227304
1.35307	0.701873	1.16352	1.06544	0.144006	0.277855	1.22053	1.85342	1.09501		0.933332	2.37271	1.44971	1.4113	0.86128	1.54795	2.01571				0.60091	0.364044	0.455881	0.873895	1.01438	1.09377	0.238088	0.795882	0.739726	0.178502
1.62391	0.785722	1.05858	1.20755	0.085044	0.518029	1.28898	1.83212	1.16317		1.08094	2.35054	1.25575	1.32594	0.800793	1.33124	1.71186				0.660783	0.266692	0.375173	0.84271	1.06208	1.08345	0.206767	0.533307	0.826851	0.17932
1.36265	0.497484	1.00797	1.40411	0.094868	0.405999	1.20181	1.63704	0.83472		0.571076	1.94977	1.07629	1.27959	0.79155	0.938511	1.40541				0.524819	0.224171	0.43317	0.826789	1.30281	1.06368	0.257982	0.561721	0.854502	0.115798
1.48283	0.723121	1.01014	1.24802	0.075003	0.335012	1.0484	1.8151	1.19122		1.17479	1.9596	1.08083	1.20167	0.705989	0.861254	1.79452				0.578756	0.2706	0.610226	0.787084	0.958513	0.984974	0.222528	0.461831	0.74217	0.1014
1.8312	0.513756	0.790922	1.67697	0.117035	0.410122	0.946151	1.28169	0.904646		0.645058	1.78022	0.977446	0.976785	0.683844	0.875493	1.40103				0.544294	0.189193	0.577848	0.66342	0.975524	0.970898	0.213128	0.4321	0.809331	0.0463778
1.41597	0.536308	1.10438	1.35981	0.098656	0.41469	0.984073	1.3692	0.952163		0.464614	1.29348	0.994795	1.25951	0.316712	1.14557	1.38513				0.670919	0.120723	0.583113	0.678184	1.03402	0.865092	0.2297	0.798337	0.605583	0.0694207
1.46247	0.593024	0.853525	1.26111	0.117325	0.411771	0.857716	1.35229	0.761346		0.819978	1.46657	1.06144	1.25116	0.67204	0.894647	1.45456				0.611769	0.18251	0.263894	0.62306	0.887625	0.899462	0.209643	0.606887	0.713923	0.0902148
1.83884	0.620789	0.826175	1.73149	0.066031	0.461443	1.02031	1.31042	1.12277		0.378724	1.28578	0.820855	0.760469	0.420208	0.703101	1.7338				0.566086	0.303663	0.52378	0.613616	0.792536	0.837116	0.204254	0.644072	0.665295	0.0544092
1.66682	0.360712	0.662795	1.53786	0.056769	0.318899	0.88301	1.22546	1.05986		0.611259	1.27241	0.797011	0.956189	0.611186	0.646659	1.74493				0.506574	0.22081	0.413916	0.591797	0.76769	0.776589	0.235656	0.572158	0.399272	0.0709394
1.57418	0.593103	0.487424	1.75013	0.079262	0.364638	0.8214	1.04374	0.847761		0.483869	1.31888	0.769607	0.937479	0.78789	0.563784	1.40421				0.471026	0.214987	0.454545	0.532857	0.925081	0.767792	0.175162	0.51831	0.63383	0.0515471
1.4773	0.358934	0.639534	1.33286	0.062224	0.407014	0.831273	1.13147	0.871319		0.857831	1.32077	0.789181	0.656439	0.411332	0.688288	1.69654				0.541832	0.226086	0.401499	0.573101	0.692241	0.72222	0.172731	0.332209	0.795744	0.0745316
1.33272	0.434884	0.658982	1.63419	0.076833	0.299995	0.904746	1.11018	0.87799		0.30302	1.0321	0.74425	1.10949	0.37848	0.510278	1.3974				0.480873	0.204435	0.471834	0.726948	0.889074	0.591371	0.202958	0.394389	0.776436	0.0694207
1.49231	0.359211	0.431659	1.27981	0.089884	0.238334	0.920512	0.702206	1.02696		0.220779	1.50449	0.722897	0.726481	0.27114	0.429829	0.981342				0.604095	0.106653	0.363463	0.480546	0.727873	0.671957	0.185859	0.434819	0.695211	0.0446255
1.19486	0.389583	0.565214	1.31365	0.070961	0.171661	0.832421	1.29628	0.815458		0.284322	1.23004	0.647004	0.925252	0.599565	0.548077	0.836763				0.532927	0.16422	0.634116	0.631733	0.822104	0.768202	0.205429	0.525326	0.712791	0.0554898

## Sheet: ie
WT												rescue												KD
1	1	1	1	1	1	1	1	1	1	1	1	1	1	1	1	1	1	1	1					1	1	1	1	1	1	1	1	1	1
1.00131	1.07515	1.00462	1.04384	1.23613	0.819005	2.68169	1.29699	1.94444	3.31303	1.75013	1.21713	2.30103	1.34842	2.03872	1.44658	0.578803	2.54333	1.08424	1.37413					0.755898	0.289725	1.00104	0.55236	0.692846	0.45875	0.702451	0.563316	0.706805	0.393046
1.20679	1.01197	0.915543	0.830613	1.32659	1.11214	2.51297	1.41695	2.00525	4.46929	1.30266	1.48282	2.97003	2.30854	2.52664	2.14481	0.658618	3.27994	1.17551	1.65893					0.865793	0.417405	1.00841	0.567943	0.966915	0.352761	0.646508	0.855127	0.711404	0.333067
0.859332	1.35604	1.02694	0.861766	1.80173	0.917997	2.64587	1.28063	1.95186	3.75398	2.1467	1.82787	2.91072	2.67482	2.51911	2.54118	0.392613	2.811	1.05723	1.9499					0.66924	0.406766	1.08411	0.450819	0.970093	0.509039	0.797943	0.68922	0.545151	0.386208
0.874541	1.19667	1.00757	0.860933	1.77051	0.914879	3.06946	0.786332	1.97846	3.92464	1.55482	1.76831	3.59408	2.38089	2.32363	2.51939	0.516279	2.65022	1.1325	1.52747					0.540678	0.311508	0.978171	0.491762	1.10372	0.480446	0.954897	0.891928	0.751206	0.402764
0.775617	1.59905	0.805344	0.916439	1.58887	1.03063	2.98583	1.01715	2.11907	3.50103	1.30825	1.50126	3.27699	2.34811	2.41114	2.76566	0.540766	3.07354	1.09783	1.82702					0.689991	0.329013	0.950348	0.426932	1.20205	0.394029	0.905737	0.775353	0.693002	0.521171
0.537923	1.1599	0.883797	0.836361	1.24195	0.969493	2.88502	1.0976	2.19818	3.94599	1.55501	1.81959	3.2151	2.46818	2.23902	2.81131	0.410739	3.10426	0.902803	1.21329					0.681528	0.269841	1.00657	0.514351	1.06712	0.51765	1.04483	1.01011	0.910281	0.499256
0.43881	1.28807	0.625276	0.761198	1.19205	0.861845	2.31507	1.03533	1.92562	3.73235	1.10381	1.58424	2.47519	2.61953	2.19476	2.6182	0.509302	2.79166	0.898634	1.05578					0.521145	0.428202	0.966582	0.665641	1.24504	0.558342	0.859229	0.941354	0.721082	0.796935
0.262394	1.31439	1.10304	0.638558	1.23821	0.964505	3.43486	0.941185	1.86046	4.0572	0.960914	1.54303	3.16293	2.3159	2.701	2.66927	0.915116	2.91709	0.919875	0.955112					0.752417	0.548539	1.23737	0.633395	1.19253	0.373835	1.03187	0.78826	0.33078	0.664786
0.29916	1.18989	1.24158	0.643955	1.39573	0.887365	4.00387	0.89932	1.83081	3.26804	1.11865	1.36845	2.31842	1.93786	2.58533	3.15881	0.574282	2.6066	1.041	1.08128					0.266514	0.196517	1.10988	0.497409	1.1611	0.3017	1.05387	0.838127	0.732259	0.669277
0.454491	1.07143	1.26431	1.02508	1.24004	0.715503	3.21735	0.877767	1.62923	3.11563	0.580647	1.26273	2.2025	2.33563	2.55995	2.79049	0.494254	2.49972	0.906182	0.577449					0.537143	0.416226	1.00209	0.498143	1.06888	0.40731	1.06621	0.937293	0.550876	0.685234
0.119256	1.40654	0.844714	0.815343	1.04201	0.722153	3.23199	0.790853	1.7752	2.89252	0.592957	1.50674	2.42752	2.55825	2.47768	2.71735	0.59145	2.55247	0.907675	0.666737					0.480165	0.160851	0.937287	0.448843	1.12438	0.362949	1.00493	0.849838	0.712812	0.743345
0.188578	1.01002	0.835363	0.749263	1.14696	0.673358	3.40805	0.723168	1.76089	3.04852	0.497906	1.15007	2.52306	2.51972	2.54577	2.53469	0.228728	2.46664	0.832543	0.805135					0.543866	0.261035	1.01694	0.545298	1.25983	0.376503	0.839105	0.952876	0.66683	0.748674
0.0932991	1.17547	0.797815	0.87787	0.995166	0.614214	2.55856	0.862549	1.26817	2.59221	0.511041	1.1422	2.18091	2.19044	2.63609	2.54942	0.490287	2.54221	0.550319	0.854595					0.43733	0.374192	1.33261	0.505937	1.09012	0.232688	0.640293	0.951491	0.307607	0.48276
0.0551813	1.08602	0.815414	0.618287	1.053	0.530673	2.62599	0.594485	1.29087	2.68981	0.450698	1.17103	2.16357	2.26179	2.35145	2.52188	0.538646	2.73138	0.437227	0.869418					0.302683	0.195128	0.781981	0.538973	1.17522	0.282719	0.805071	0.919569	0.444781	0.540361
0.0918535	0.986005	1.00459	0.69617	1.07856	0.728304	2.26717	0.831731	1.3332	2.60789	0.336675	1.00262	1.67144	1.87195	2.45159	2.75973	0.29829	2.22484	0.690882	1.02194					0.317289	0.206161	0.950831	0.557609	1.05211	0.365224	0.640814	1.07616	0.260898	0.641494
0.160516	0.861455	0.732454	0.542948	1.02916	0.588362	2.93257	0.594357	1.25355	2.51301	0.254251	1.06896	1.6823	1.94374	2.09273	2.28306	0.289193	1.95026	0.706462	1.03751					0.549489	0.151915	1.05994	0.529034	1.1636	0.370894	0.844451	1.06662	0.494943	0.75077
0.316349	0.984454	0.806111	0.804549	1.16807	0.506068	2.81399	0.507221	1.10478	2.70777	0.252792	1.00028	1.62955	2.28905	1.99577	2.26309	0.744254	2.21753	0.633042	0.851401					0.412812	0.288158	0.959936	0.364134	0.877392	0.282506	0.556926	1.19361	0.428378	0.528925
0.151843	0.698815	0.815894	0.896957	0.94807	0.623525	2.85512	0.446922	1.15286	2.21997	0.495495	1.1388	1.82434	2.13013	2.07491	2.62548	0.399453	2.08235	0.495243	1.04889					0.280483	0.101207	0.90806	0.486962	0.952944	0.209613	0.600565	0.984987	0.355407	0.532188
0.148009	0.572886	0.776572	0.45019	0.820565	0.757274	2.69503	0.331928	0.884769	2.04575	0.443591	1.03234	1.28538	1.93299	1.77205	2.36291	0.238098	2.31527	0.480585	0.963996					-0.0228374	0.168241	0.938414	0.20364	1.03582	0.344787	0.678282	1.0811	0.294339	0.474107
0.101564	0.65705	0.934629	0.509293	0.990468	0.736076	2.18479	0.30907	1.11581	2.0595	0.251586	1.14593	1.57122	1.29586	1.97782	2.80815	0.599932	2.1512	0.377236	0.853846					-0.0142009	0.252152	0.960948	0.218831	0.950132	0.414708	0.481469	1.13367	0.376626	0.600448
0.208847	0.831179	0.911467	0.403328	0.871813	0.39468	2.02254	0.481751	0.895822	1.98194	0.160533	1.22382	1.20131	1.56736	2.01019	2.27082	0.483174	2.17093	0.380176	1.04021					0.337286	0.147434	0.720194	0.341658	0.796817	0.240056	0.6765	1.149	0.300882	0.617962
0.140467	0.740581	0.76324	0.581034	0.80499	0.339942	2.65765	0.232598	0.940187	1.99693	0.21047	1.35161	1.37889	1.13641	1.5219	2.1061	0.344802	1.77925	0.544965	0.861782					0.391308	0.127727	1.07932	0.230746	0.776363	0.299608	0.539061	0.986907	0.273484	0.64338
0.0170949	0.903795	0.475131	0.498455	0.802515	0.476143	1.82483	0.357716	0.815778	1.40171	0.303934	1.27511	1.18128	1.49174	1.61722	2.41161	0.324897	1.55897	0.447057	1.13474					0.369456	0.202466	0.95582	0.247632	0.680064	0.222379	0.638771	0.961281	0.700862	0.41453
0.134402	0.717889	0.51196	0.455148	0.811462	0.447589	1.64388	0.350266	0.624765	1.45847	0.354505	1.13483	1.43006	1.10871	1.61586	2.21952	0.270178	1.64958	0.597056	0.85165					0.501901	0.199845	1.00169	0.276094	0.917771	0.159977	0.776036	1.0035	0.559963	0.605029
0.0940847	0.572599	0.452401	0.497402	1.01524	0.347589	2.49571	0.358798	0.580842	1.4351	0.396383	1.34568	1.63599	1.30407	1.70379	2.33927	0.347469	1.69109	0.440167	1.18459					0.335837	0.196491	0.893367	0.254917	0.915214	0.274926	0.740481	1.1213	0.331052	0.391627
0.0877998	0.63723	0.376681	0.418597	0.677505	0.349418	1.95175	0.452112	0.498499	1.51585	0.207107	0.977704	1.10268	1.17671	1.46807	2.19847	0.619357	1.62246	0.41546	1.24723					0.249936	0.131684	0.878788	0.225607	0.866873	0.152912	0.636424	0.76934	0.280072	0.399381
0.0199545	0.641481	0.389293	0.226236	0.818596	0.428969	2.5505	0.18739	0.605644	1.27722	0.209581	1.00822	2.02783	1.00571	1.82102	1.86813	0.478454	1.55004	0.447759	1.65898					0.753866	0.180034	0.617431	0.259491	0.648616	0.214404	0.659852	1.07068	0.490399	0.462102
0.192569	1.0083	0.258809	0.218162	0.768421	0.568205	2.77881	0.206015	0.386668	1.24821	0.146066	1.11549	1.38781	1.57187	1.55671	1.7446	0.426471	1.30809	0.34814	1.17496					0.535694	0.211087	0.848205	0.221485	0.747636	0.176654	0.49829	0.986215	0.35577	0.542427
0.0355724	0.710478	0.540828	0.310876	0.566238	0.310308	1.72481	0.378473	0.480348	1.26073	0.223794	1.08028	1.30473	1.17784	1.34343	1.82598	0.578454	1.39906	0.360121	0.947925					0.155283	0.145127	0.82889	0.17433	0.737391	0.298364	0.611475	0.915256	0.469044	0.372915
0.0816092	0.496651	0.44492	0.278802	0.631248	0.466542	2.31131	0.416868	0.316085	0.96277	0.181853	0.888942	1.15511	1.25318	1.43316	1.52261	0.715937	1.3842	0.359155	1.06117					0.247908	0.222565	0.637712	0.229165	0.664742	0.216163	0.60439	0.917208	0.132539	0.344054
