# Supplementary material for: Progressive overfilling of readily releasable pool underlies short-term facilitation at recurrent excitatory synapses in layer 2/3 of the rat prefrontal cortex
Source: eLife. 2026 Feb 18;14:RP102923. doi: 10.7554/eLife.102923 (PMC12890252; doi:10.7554/eLife.102923)
Supplement: Figure 5—source data 1. [file elife-102923-fig5-data1.xlsx]

## Sheet: ee
5Hz	sem	10Hz	sem	20Hz	sem	40Hz	sem
1	0	1	0	1	0	1	0
0.692588	0.0648659	0.569127	0.0589219	0.398111	0.0791371	0.305272	0.0906248
0.6872	0.0553907	0.642552	0.0788254	0.44445	0.0687469	0.307189	0.0750069
0.677926	0.0618244	0.649992	0.0542696	0.50048	0.0619858	0.256346	0.0577985
0.745655	0.0615118	0.601655	0.0471164	0.515169	0.0458249	0.287988	0.0524805
0.666006	0.0735252	0.66664	0.0645539	0.491207	0.0598866	0.264449	0.0544146
0.670971	0.0416677	0.634836	0.0474573	0.498273	0.0502404	0.297367	0.0500477
0.641006	0.062322	0.614128	0.0476406	0.452091	0.0474609	0.280219	0.0572877
0.779444	0.0732048	0.601883	0.0397384	0.504646	0.0460662	0.278136	0.047633
0.73566	0.0904254	0.68952	0.0539835	0.447861	0.0487342	0.312862	0.0432683
0.759508	0.0734477	0.671309	0.0542809	0.517583	0.0441154	0.319669	0.071166
0.830479	0.0572619	0.70974	0.0459117	0.446547	0.0470918	0.287883	0.0593774
0.791916	0.0828883	0.639107	0.0590575	0.539624	0.0428002	0.282365	0.0596059
0.751433	0.0718247	0.696249	0.0349339	0.427434	0.0518973	0.341662	0.0582711
0.746923	0.0529575	0.698989	0.0705864	0.487672	0.0590616	0.329429	0.0520759
0.729427	0.0706665	0.713846	0.0680288	0.468672	0.0528655	0.263347	0.0338189
0.71071	0.105632	0.723205	0.0731796	0.477855	0.0643573	0.256708	0.0339337
0.80037	0.0932543	0.730809	0.0636594	0.462509	0.0477587	0.200524	0.0295596
0.826233	0.0719779	0.703692	0.0874059	0.459319	0.0527079	0.290668	0.0448968
0.730334	0.0874376	0.712129	0.0378518	0.443667	0.0622376	0.247856	0.0503616

## Sheet: ie
5Hz	sem	10Hz	sem	20Hz	sem	40Hz	sem
1	0	1	0	1	0	1	0
0.621276	0.0668316	0.528244	0.0317646	0.427108	0.0870431	0.405221	0.0546619
0.607006	0.0652527	0.546326	0.0605611	0.380393	0.054999	0.384885	0.0671874
0.636108	0.07799	0.505499	0.0914858	0.467006	0.0947816	0.296744	0.0464512
0.603546	0.0849787	0.613199	0.0817283	0.504952	0.0938403	0.288221	0.0561746
0.636708	0.0820665	0.623005	0.100823	0.519554	0.0878476	0.315632	0.041202
0.630279	0.0798917	0.620013	0.0994017	0.531959	0.0900156	0.292665	0.0431898
0.695811	0.0915779	0.608114	0.0657588	0.527808	0.108582	0.276475	0.0361198
0.732721	0.0896358	0.603083	0.118564	0.559039	0.0844301	0.254103	0.0384602
0.717424	0.0846588	0.573555	0.0769468	0.493343	0.0771528	0.335638	0.0628491
0.734183	0.0598948	0.608801	0.0921374	0.485287	0.0750627	0.313515	0.0658148
0.671284	0.0934619	0.666732	0.106819	0.48998	0.0913539	0.324474	0.0537541
0.780004	0.0843832	0.637439	0.0966292	0.466482	0.0750818	0.287121	0.0519162
0.702689	0.0910911	0.612694	0.101364	0.479884	0.0777897	0.311239	0.060722
0.706329	0.0799226	0.688306	0.115639	0.441163	0.0655487	0.32543	0.047515
0.742359	0.0875346	0.618135	0.084111	0.549498	0.0787638	0.269206	0.0484187
0.764613	0.0780734	0.631711	0.0976179	0.512037	0.0633814	0.229058	0.0310891
0.835443	0.13848	0.603731	0.0898186	0.484196	0.0639847	0.267578	0.0347148
0.779252	0.0983229	0.739994	0.0842018	0.444715	0.0631185	0.297998	0.0856886
0.730348	0.0688783	0.591852	0.109384	0.492178	0.082314	0.286191	0.0395527
