# Supplementary material for: Progressive overfilling of readily releasable pool underlies short-term facilitation at recurrent excitatory synapses in layer 2/3 of the rat prefrontal cortex
Source: eLife. 2026 Feb 18;14:RP102923. doi: 10.7554/eLife.102923 (PMC12890252; doi:10.7554/eLife.102923)
Supplement: Figure 6—source data 1. [file elife-102923-fig6-data1.xlsx]

## Sheet: ee_kd
d01s	sem	d02s	sem	d05s	sem	d1s	sem	d2s	sem	d5s	sem	d10s	sem
1	0	1	0	1	0	1	0	1	0	1	0	1	0
0.217748	0.0559203	0.209119	0.0472141	0.334087	0.0506526	0.163144	0.0334384	0.307386	0.0658625	0.165133	0.0478841	0.254269	0.0335746
0.249933	0.0397531	0.251006	0.0466854	0.214043	0.0413229	0.181441	0.0394345	0.251237	0.0534974	0.209435	0.0385817	0.230966	0.0199605
0.239383	0.0301906	0.275658	0.0487835	0.191721	0.0210987	0.245047	0.0659033	0.248781	0.040345	0.274209	0.0381528	0.180094	0.0283655
0.195982	0.0352573	0.347394	0.085636	0.242528	0.0376308	0.272301	0.0563528	0.273506	0.0293561	0.27495	0.0397705	0.308903	0.0478369
0.298764	0.0457142	0.343347	0.0663829	0.250245	0.0337107	0.299001	0.0634596	0.30332	0.0405668	0.320799	0.0701599	0.271497	0.0462316
0.25601	0.0277143	0.277504	0.0399295	0.261204	0.0266492	0.237909	0.0304141	0.280202	0.0492081	0.324862	0.0577798	0.264378	0.056112
0.288422	0.0269206	0.315511	0.0686675	0.241411	0.0462276	0.257217	0.0453011	0.30528	0.0379163	0.301219	0.0612458	0.251686	0.0310701
0.261362	0.0344959	0.304712	0.0313056	0.288389	0.0447119	0.291681	0.0767675	0.311758	0.0387507	0.361787	0.0670188	0.296972	0.0473942
0.249503	0.0434125	0.320386	0.0454446	0.286181	0.0399826	0.237523	0.0216565	0.266429	0.0583223	0.266336	0.0394867	0.236178	0.0446492
0.266678	0.0297781	0.367528	0.0429249	0.245884	0.0255517	0.263981	0.0483886	0.205766	0.0311293	0.241393	0.0388778	0.2772	0.0665127
0.278591	0.0310205	0.387282	0.0330653	0.330939	0.0372394	0.280574	0.0423314	0.297087	0.0327325	0.264399	0.0492775	0.291608	0.06073
0.291377	0.0405149	0.342534	0.0362874	0.271679	0.0390744	0.239492	0.0550431	0.344947	0.0560053	0.23168	0.0417173	0.278331	0.0450201
0.330345	0.0471362	0.326496	0.0507899	0.273021	0.0422858	0.259824	0.040359	0.263727	0.0407673	0.259257	0.0402264	0.29588	0.0225245
0.261677	0.0423099	0.348334	0.0356076	0.302691	0.0731617	0.242962	0.0614392	0.29968	0.0468588	0.246489	0.0355589	0.323437	0.0486692
0.248479	0.0198146	0.296572	0.0417791	0.244756	0.047617	0.325904	0.0481262	0.266578	0.0350671	0.249749	0.02813	0.248544	0.045271
0.278046	0.0613905	0.36466	0.0341724	0.210148	0.0385995	0.233456	0.0332997	0.280239	0.0386286	0.226905	0.0292503	0.259543	0.0406799
0.261572	0.0484784	0.339552	0.0385534	0.306233	0.0586687	0.231797	0.0420904	0.25332	0.0158998	0.234392	0.0370032	0.253801	0.0452069
0.266104	0.0568691	0.341114	0.0560139	0.27819	0.0398746	0.260006	0.0342067	0.223361	0.0406338	0.21373	0.0411128	0.210881	0.0568395
0.254734	0.0395975	0.306191	0.0479298	0.226257	0.0498069	0.23346	0.0372953	0.268787	0.0281282	0.206303	0.0172094	0.311292	0.0411999
0.265998	0.0400604	0.274143	0.0349968	0.233971	0.0426626	0.247442	0.0440934	0.255533	0.0391915	0.26362	0.0369103	0.216138	0.0358858
0.27858	0.0448578	0.290176	0.0535677	0.230156	0.0389595	0.28478	0.057334	0.243159	0.0405071	0.253832	0.057523	0.230581	0.0426938
0.191399	0.0233827	0.264622	0.026573	0.265851	0.0619144	0.196016	0.0481457	0.190252	0.0403441	0.21468	0.0374153	0.253981	0.0674088
0.256875	0.0196627	0.267912	0.0427366	0.158782	0.0405256	0.193549	0.0310197	0.263095	0.0464282	0.189703	0.0467953	0.28934	0.048706
0.191074	0.0309947	0.23927	0.0336016	0.267919	0.0488126	0.241186	0.0431507	0.179454	0.0240343	0.220437	0.0475398	0.215851	0.025339
0.19046	0.0301687	0.231798	0.0287257	0.230748	0.0337812	0.188483	0.0407339	0.210608	0.0194968	0.21123	0.0412304	0.213759	0.0251668
0.252828	0.0457159	0.252515	0.0327872	0.256488	0.015786	0.235609	0.0376565	0.239287	0.0254904	0.248167	0.0561057	0.238584	0.0326886
0.182088	0.0347193	0.26832	0.0329124	0.217561	0.0348725	0.212893	0.0354842	0.270652	0.0450432	0.212915	0.054063	0.220884	0.0199805
0.23076	0.0301878	0.294277	0.0619411	0.221798	0.0283728	0.265512	0.0461078	0.208667	0.0361815	0.202645	0.0276536	0.158693	0.0432471
0.229897	0.0360938	0.239349	0.0338545	0.216857	0.0346404	0.16443	0.0295748	0.24858	0.0265048	0.173907	0.0273694	0.236586	0.0368905
0.659962	0.123993	0.893759	0.0574888	0.950677	0.0741741	0.963196	0.0720738	1.03068	0.0738516	1.1146	0.0778693	1.17243	0.121238
0.233128	0.0394829	0.344269	0.05803	0.25697	0.0560395	0.138496	0.036385	0.237919	0.0498248	0.23329	0.0616935	0.305567	0.0307805
0.246554	0.0279257	0.434223	0.075419	0.335447	0.029929	0.192147	0.047693	0.343775	0.0908571	0.265911	0.101677	0.24701	0.0537532
0.229318	0.0300431	0.320556	0.0611634	0.357571	0.0476561	0.331065	0.100764	0.287402	0.0455377	0.178771	0.0333478	0.249234	0.0403606
0.220093	0.0349969	0.293883	0.0342587	0.330643	0.0505179	0.282636	0.0655064	0.231708	0.0332828	0.244923	0.0807424	0.362559	0.0738165
0.265117	0.0352999	0.329563	0.067869	0.246364	0.0517462	0.258883	0.0449572	0.237913	0.0393423	0.257196	0.0398617	0.291326	0.0462418
0.199718	0.0277212	0.312323	0.055397	0.183169	0.0382072	0.273111	0.0534119	0.241019	0.0358945	0.264423	0.0844883	0.286816	0.0573665
0.2085	0.0329621	0.266154	0.0292011	0.262447	0.0454758	0.208446	0.0460067	0.299775	0.0592703	0.286446	0.0498183	0.297498	0.0693352
0.168637	0.0311485	0.270112	0.0382154	0.258143	0.0460764	0.196573	0.046991	0.259845	0.04678	0.314739	0.0795619	0.251334	0.0316366
0.175139	0.0232867	0.256836	0.0443906	0.251971	0.0516572	0.289856	0.0426304	0.30381	0.0451336	0.245088	0.0632775	0.293775	0.0364338
0.254055	0.0444946	0.206543	0.0282118	0.166153	0.0295235	0.232572	0.0321626	0.279951	0.0521873	0.250031	0.0459482	0.28942	0.0411715
0.164151	0.0264848	0.285505	0.0233394	0.238979	0.0580185	0.25986	0.058758	0.26853	0.0200522	0.292592	0.0391273	0.30644	0.0531879
0.182351	0.0271246	0.226123	0.0297548	0.222619	0.0285881	0.248282	0.0394557	0.245983	0.0220364	0.228465	0.0438717	0.246122	0.035861
0.148322	0.0399129	0.237678	0.0274947	0.218984	0.048113	0.261	0.0436806	0.230481	0.0432675	0.254535	0.0266943	0.279363	0.0498559
0.179005	0.039816	0.23675	0.0371007	0.319435	0.0553183	0.167937	0.0292153	0.303539	0.0346276	0.255935	0.0446735	0.277903	0.0417069
0.102816	0.0237678	0.186353	0.0305707	0.170225	0.0416955	0.284182	0.0584139	0.221692	0.0249574	0.253125	0.0596091	0.228708	0.0381835
0.158543	0.027576	0.183836	0.0356312	0.227291	0.0235719	0.203974	0.0380108	0.268429	0.031475	0.246436	0.0365793	0.421179	0.0882538
0.159013	0.03567	0.225141	0.0375338	0.181194	0.0335708	0.165881	0.0371443	0.204578	0.037108	0.32027	0.0749699	0.274399	0.0748515
0.16406	0.0385535	0.228932	0.0377572	0.151355	0.0384377	0.254166	0.0524603	0.173775	0.0231173	0.230705	0.0368998	0.259263	0.0316627
0.142113	0.0241029	0.130499	0.0281518	0.136306	0.0298017	0.171213	0.013723	0.165075	0.0363649	0.199301	0.0377387	0.191561	0.0375777
0.160559	0.0241147	0.166938	0.0330459	0.174131	0.0261535	0.201294	0.0318193	0.184598	0.0296189	0.192618	0.0356116	0.238798	0.0269719
0.14867	0.0293019	0.247148	0.0387143	0.145882	0.0185945	0.242834	0.0614617	0.222181	0.0237118	0.236973	0.034607	0.273224	0.0417457
0.155517	0.0385292	0.178211	0.0299801	0.246084	0.0424418	0.213012	0.0342203	0.214781	0.0395698	0.271439	0.0471353	0.253383	0.0460821
0.110838	0.0265186	0.182748	0.0453872	0.185413	0.045485	0.192947	0.0395528	0.188702	0.027709	0.153658	0.0285724	0.255157	0.0514282
0.158525	0.0359167	0.213738	0.0376177	0.24516	0.0557072	0.161541	0.0345927	0.206172	0.0396337	0.194456	0.0315655	0.199148	0.0127821
0.177218	0.0346349	0.208491	0.0339825	0.210318	0.0371291	0.185612	0.0349118	0.228488	0.0174665	0.157877	0.0276001	0.218375	0.0461977
0.16456	0.0319556	0.177276	0.0207749	0.159235	0.0284389	0.150033	0.0285576	0.227763	0.0389527	0.174697	0.0399545	0.16208	0.0349259
0.175468	0.0202221	0.150484	0.0327742	0.15672	0.0275876	0.191621	0.0421432	0.188946	0.0301582	0.188604	0.0363616	0.188533	0.0230508
0.133393	0.0205265	0.124823	0.0344395	0.129803	0.0208215	0.161548	0.0345271	0.220208	0.0398276	0.238545	0.0325834	0.233614	0.0470821
0.144784	0.0345733	0.180387	0.0338455	0.127207	0.0227914	0.226746	0.0495797	0.207715	0.0328598	0.217903	0.0299858	0.177152	0.0419146

## Sheet: ie_kd
d01s	sem	d02s	sem	d05s	sem	d1s	sem	d2s	sem	d5s	sem	d10s	sem
1	0	1	0	1	0	1	0	1	0	1	0	1	0
0.249649	0.0468672	0.394306	0.0954027	0.247928	0.0421969	0.326669	0.0578541	0.263773	0.0579047	0.268278	0.0505618	0.394158	0.0821751
0.219411	0.0336863	0.290472	0.0570402	0.243618	0.0417423	0.2919	0.0519229	0.24267	0.0503592	0.206284	0.0393364	0.272252	0.0498569
0.241179	0.0332346	0.161738	0.0239004	0.259837	0.0453969	0.280907	0.0566663	0.23634	0.0483717	0.26893	0.0491114	0.205827	0.0359709
0.237053	0.0282922	0.249204	0.0505435	0.201419	0.0420566	0.230725	0.0543942	0.178079	0.0693531	0.37676	0.0599286	0.363113	0.0556315
0.293798	0.0377354	0.244821	0.0460421	0.165311	0.0469875	0.229628	0.0409961	0.230617	0.0517787	0.337998	0.0552284	0.288195	0.0343233
0.234895	0.0212477	0.224461	0.0310122	0.200804	0.0355021	0.225088	0.0326881	0.233644	0.0721866	0.390023	0.0726674	0.308365	0.0527132
0.309448	0.056559	0.260381	0.0518435	0.201282	0.0440178	0.207943	0.0336881	0.179352	0.0590661	0.293012	0.0560198	0.310146	0.0485485
0.278077	0.0385829	0.248638	0.0388337	0.192745	0.0502612	0.232936	0.0445549	0.165367	0.0520603	0.301077	0.0456641	0.299688	0.028206
0.289865	0.0349654	0.266117	0.0438097	0.271496	0.0480973	0.259168	0.0559381	0.240324	0.0762562	0.350677	0.0744368	0.297664	0.0383734
0.242806	0.0346554	0.280526	0.0482733	0.205676	0.039584	0.228425	0.0540047	0.218928	0.0830535	0.294042	0.0620586	0.329326	0.0555882
0.242061	0.0491445	0.242971	0.0447922	0.178448	0.0311143	0.202726	0.0392567	0.188564	0.0533752	0.233426	0.0440065	0.356067	0.0898013
0.342164	0.0588097	0.206652	0.0443299	0.18703	0.0363926	0.210622	0.0353816	0.184309	0.0612662	0.298925	0.0848136	0.241355	0.0289309
0.325886	0.0433693	0.18826	0.0388114	0.17125	0.0374623	0.254078	0.0422897	0.188191	0.0606784	0.249157	0.0675966	0.270414	0.0244553
0.273359	0.0392442	0.254919	0.0664048	0.269492	0.0522081	0.206061	0.0381153	0.182372	0.0481576	0.275069	0.0561324	0.283981	0.0570003
0.307378	0.0528402	0.223533	0.0405675	0.173307	0.0334823	0.283534	0.0580672	0.185023	0.0564953	0.267845	0.0542713	0.254422	0.0450103
0.268026	0.0296336	0.214518	0.0432311	0.182903	0.0549291	0.217219	0.0368667	0.205079	0.0500802	0.213834	0.0407679	0.278908	0.0427649
0.277245	0.0604938	0.246729	0.0393554	0.197924	0.0269045	0.248849	0.0415239	0.163749	0.0379911	0.222819	0.0251737	0.229751	0.0375561
0.269515	0.0473651	0.24769	0.0319112	0.18864	0.0392607	0.228072	0.0396869	0.245664	0.0510232	0.184198	0.0357078	0.247131	0.0332087
0.25092	0.0317151	0.260021	0.0513539	0.194589	0.0212659	0.27015	0.0459008	0.242639	0.0642272	0.226569	0.0453277	0.202358	0.0324656
0.251319	0.046588	0.176436	0.0453888	0.175621	0.0372723	0.223925	0.0460302	0.234725	0.0650282	0.210214	0.0500929	0.289263	0.055705
0.27238	0.0491062	0.197074	0.0280257	0.137408	0.0298575	0.271176	0.0563299	0.210307	0.0482911	0.198225	0.0430823	0.259807	0.0458329
0.305812	0.0739156	0.181908	0.0392187	0.156327	0.0327953	0.17023	0.0371272	0.208223	0.057358	0.212591	0.0475623	0.267978	0.0480966
0.254969	0.0422807	0.250511	0.0255007	0.144636	0.0212268	0.251762	0.0413796	0.168564	0.0481201	0.226921	0.0284003	0.294846	0.0359417
0.248483	0.0488073	0.210234	0.053131	0.200867	0.030383	0.256868	0.0522449	0.211254	0.0312974	0.219734	0.0523967	0.294765	0.0366563
0.228518	0.0539592	0.206676	0.0334932	0.183399	0.0209611	0.247478	0.076827	0.183241	0.0456094	0.221357	0.054855	0.250998	0.039084
0.213312	0.0423207	0.17843	0.0313322	0.194254	0.0327592	0.173032	0.0381027	0.159343	0.0342158	0.235894	0.0574101	0.226633	0.0337347
0.229917	0.0673127	0.169434	0.0287565	0.17339	0.0416616	0.243149	0.0590976	0.170236	0.0488486	0.218923	0.076267	0.254888	0.0476184
0.234195	0.042689	0.173794	0.0310651	0.161954	0.0421305	0.2208	0.0484442	0.170065	0.0347519	0.172899	0.025993	0.251418	0.0468247
0.190522	0.0201874	0.158368	0.037391	0.145447	0.0327886	0.211598	0.0427909	0.227829	0.0807281	0.183806	0.0389609	0.206229	0.0364508
0.749866	0.0978741	0.800831	0.107603	0.880787	0.0688916	1.03044	0.1241	1.16269	0.0770178	1.45409	0.119619	1.32563	0.130282
0.287056	0.0489773	0.296862	0.0521395	0.265764	0.0504652	0.297035	0.0684777	0.249245	0.0671265	0.309995	0.0704736	0.350366	0.0582915
0.228191	0.0297107	0.277552	0.0350088	0.301501	0.0660806	0.275205	0.0615185	0.237737	0.0588595	0.327206	0.0424211	0.244175	0.0288739
0.269146	0.0389412	0.234983	0.0425632	0.229349	0.0545449	0.20863	0.0617386	0.192485	0.0465081	0.37407	0.0583812	0.358825	0.0428863
0.239613	0.0298835	0.314623	0.0491386	0.199537	0.0432382	0.250359	0.0418352	0.283203	0.0925003	0.325137	0.0508131	0.333124	0.0392845
0.246723	0.0532597	0.172304	0.0221588	0.237362	0.0648824	0.258415	0.0368638	0.214227	0.0660838	0.368068	0.08733	0.238378	0.039278
0.241342	0.032113	0.23888	0.0423324	0.234162	0.0559906	0.244733	0.0509139	0.235692	0.0591177	0.305763	0.0577468	0.288679	0.042026
0.185554	0.0316315	0.188594	0.0412321	0.196782	0.0376696	0.213118	0.0452522	0.216776	0.0672549	0.347347	0.0861347	0.314478	0.0479743
0.260153	0.0614314	0.176243	0.0314867	0.250779	0.0469775	0.17031	0.0479641	0.25764	0.0661541	0.288455	0.0689263	0.246468	0.0308989
0.20402	0.0386026	0.199604	0.049884	0.185884	0.0408798	0.28989	0.0323496	0.171255	0.0705455	0.288206	0.0858196	0.277742	0.05316
0.187901	0.0414943	0.207015	0.0271085	0.229187	0.0490928	0.207695	0.0445302	0.233971	0.0785164	0.272147	0.0726445	0.313532	0.0339552
0.214019	0.038838	0.235518	0.0408678	0.168207	0.0370435	0.24541	0.0410049	0.187529	0.0624536	0.306057	0.0535767	0.331658	0.0499655
0.236993	0.0622978	0.148333	0.0248724	0.149075	0.035038	0.231822	0.0367016	0.19075	0.0584645	0.334195	0.0587967	0.285544	0.0317133
0.216505	0.0394305	0.203479	0.0429902	0.178711	0.0360261	0.224175	0.0429484	0.206512	0.0767292	0.262621	0.0653957	0.275867	0.0332044
0.188299	0.0518232	0.220568	0.0557203	0.166465	0.0372408	0.240112	0.0471971	0.25572	0.06629	0.245667	0.0396328	0.331832	0.0525785
0.197855	0.0346526	0.138005	0.0252913	0.152477	0.0448133	0.204074	0.0342577	0.177826	0.0414617	0.24789	0.0450172	0.295224	0.0316498
0.189731	0.0252644	0.134139	0.0196093	0.187911	0.0361768	0.183709	0.0344519	0.218379	0.0557052	0.248876	0.0619774	0.268587	0.0335494
0.180314	0.037665	0.135278	0.01937	0.142107	0.0418917	0.158578	0.0275489	0.210676	0.0676125	0.230287	0.0256662	0.299435	0.053741
0.172798	0.0270886	0.153971	0.0328614	0.164065	0.0337564	0.16248	0.0269815	0.151014	0.0441253	0.233198	0.0430975	0.272214	0.0356686
0.141098	0.0167246	0.188424	0.0424726	0.138838	0.0244787	0.155102	0.0417859	0.187582	0.0398642	0.265939	0.0555934	0.294841	0.0542363
0.183141	0.0359619	0.176225	0.0302966	0.103928	0.0276262	0.207865	0.0366264	0.202733	0.0606361	0.188118	0.0336028	0.27969	0.0497575
0.148842	0.0263327	0.173271	0.0272307	0.14771	0.0312632	0.189988	0.0565835	0.200352	0.04159	0.219127	0.0233689	0.245292	0.0218185
0.165351	0.0242283	0.203323	0.0346806	0.155776	0.0288416	0.172951	0.0328281	0.190061	0.055323	0.144799	0.025876	0.299302	0.040072
0.140231	0.0148693	0.176923	0.0546702	0.168055	0.041713	0.186023	0.0380982	0.169848	0.041518	0.225599	0.0426454	0.274132	0.0348485
0.201793	0.059065	0.155321	0.0193034	0.131677	0.0319075	0.209137	0.0430615	0.161379	0.0384082	0.197788	0.0279716	0.321342	0.0469469
0.159336	0.0396022	0.212931	0.0705885	0.151678	0.0262527	0.18874	0.0289352	0.142039	0.0225118	0.188993	0.0236455	0.265388	0.0486166
0.204722	0.0532145	0.1985	0.042491	0.185505	0.039702	0.132397	0.0417889	0.12639	0.0208015	0.213889	0.0515983	0.228595	0.0334745
0.179703	0.0332388	0.184782	0.0481924	0.191383	0.045694	0.205561	0.0563645	0.194763	0.042132	0.138627	0.0267201	0.226843	0.0415795
0.171662	0.0449714	0.161692	0.0282246	0.159583	0.0417165	0.198307	0.0340565	0.136741	0.0301029	0.205435	0.0372325	0.208544	0.0332173
0.182292	0.0324246	0.13369	0.0281474	0.121941	0.0244101	0.204676	0.0494191	0.149437	0.0395435	0.144566	0.0206712	0.246233	0.0377355
