# Supplementary material for: Progressive overfilling of readily releasable pool underlies short-term facilitation at recurrent excitatory synapses in layer 2/3 of the rat prefrontal cortex
Source: eLife. 2026 Feb 18;14:RP102923. doi: 10.7554/eLife.102923 (PMC12890252; doi:10.7554/eLife.102923)
Supplement: Figure 6—source data 2. [file elife-102923-fig6-data2.xlsx]

## Sheet: ee_kd
mean(5 Hz)	var(5 Hz)	mean(40 Hz & PTA)	var(40 Hz & PTA)
47.8655	461.511	45.1123	320.503
30.1527	281.219	9.53283	181.941
32.0328	352.693	8.10238	127.281
32.569	351.436	8.18106	125.216
33.9721	501.64	9.12926	161.129
29.6455	316.058	11.54	227.893
30.9686	325.856	10.6879	188.611
29.8336	411.892	11.0621	217.849
33.1558	351.439	11.2164	214.147
32.8303	457.425	10.8714	208.584
32.7661	371.262	9.62297	186.125
37.6366	324.829	11.1084	214.945
35.5959	341.482	11.5904	200.424
34.8844	468.075	10.8435	210.546
36.1386	381.628	12.2523	242.428
33.8106	340.601	10.4525	163.934
31.7815	325.377	11.0106	207.529
35.2973	282.185	10.1462	171.668
37.5637	296.274	10.4057	223.308
33.7098	349.376	9.80763	181.589
		9.68633	180.391
		10.1856	153.3
		8.25755	178.985
		8.37564	165.45
		8.41252	185.642
		7.43281	115.996
		9.19733	152.554
		8.47846	152.406
		8.27	167.973
		8.65247	156.867
		29.4744	276.538
		41.5647	236.207
		41.9746	335.04

## Sheet: ie_kd
mean(5 Hz)	var(5 Hz)	mean(40 Hz & PTA)	var(40 Hz & PTA)
45.3709	846.947	69.3928	1406.63
35.12	494.65	19.3996	707.574
31.8612	766.425	15.762	470.88
36.5516	881.794	15.4839	628.424
35.3443	877.774	13.891	431.532
40.2466	1497.61	13.4068	515.957
35.7857	1439.04	14.3724	461.143
37.8769	815.26	14.9569	528.917
41.4671	768.206	15.7047	528.606
41.2286	602.66	16.6524	531.654
41.2834	1415.63	15.3702	469.284
41.1044	1069.46	14.3718	480.343
40.2641	588.131	13.5701	316.858
36.8747	791.366	14.2695	529.855
35.9576	972.492	15.6536	444.525
40.9017	774.339	15.2521	495.173
43.1831	873.548	13.9356	451.938
49.8491	804.078	14.6443	950.477
47.7983	1001.55	14.8485	535.069
40.0509	644.052	14.7071	405.892
		13.5321	426.076
		14.0747	456.335
		13.7084	470.933
		12.8284	449.443
		12.7133	410.294
		11.6007	336.862
		12.7922	354.44
		12.2008	355.209
		12.5394	528.416
		10.8378	670.92
		48.6012	1328.99
		63.2075	672.026
		63.7636	889.599
