# Supplementary material for: Progressive overfilling of readily releasable pool underlies short-term facilitation at recurrent excitatory synapses in layer 2/3 of the rat prefrontal cortex
Source: eLife. 2026 Feb 18;14:RP102923. doi: 10.7554/eLife.102923 (PMC12890252; doi:10.7554/eLife.102923)
Supplement: Figure 7—source data 1. [file elife-102923-fig7-data1.xlsx]

## Sheet: ee
d01s	sem	d02s	sem	d05s	sem	d1s	sem	d2s	sem	d5s	sem
1	0	1	0	1	0	1	0	1	0	1	0
0.431347	0.0532724	0.452137	0.0673883	0.398254	0.079072	0.361857	0.0757027	0.435514	0.111755	0.442608	0.0709714
0.47097	0.0620481	0.516976	0.0848994	0.451063	0.0903222	0.397048	0.0622943	0.490751	0.101937	0.594456	0.113807
1.09775	0.0586294	1.08453	0.0830393	1.03892	0.0735676	1.07602	0.0415495	1.02312	0.0575672	1.05386	0.0582264
0.530176	0.08069	0.541637	0.102152	0.472481	0.103169	0.389304	0.0714829	0.464406	0.120182	0.505363	0.0877175
0.709319	0.113377	0.686945	0.0987671	0.5365	0.0943874	0.46072	0.0659674	0.483761	0.110417	0.578128	0.0988742

## Sheet: ie
d01s	sem	d02s	sem	d05s	sem	d1s	sem	d2s	sem	d5s	sem
1	0	1	0	1	0	1	0	1	0	1	0
0.48094	0.114186	0.339885	0.0625277	0.484379	0.0846295	0.478808	0.0794051	0.454574	0.0869258	0.404628	0.0789234
0.468783	0.0813951	0.398855	0.0707314	0.519275	0.0888054	0.574369	0.135399	0.547625	0.130227	0.583792	0.124068
1.07529	0.0595982	1.01534	0.142421	1.01725	0.0573696	1.04884	0.096364	1.07822	0.0889604	0.989941	0.037467
0.568447	0.106358	0.407587	0.0602137	0.597425	0.0871739	0.535676	0.117389	0.412582	0.0924738	0.470926	0.11312
0.562874	0.0921999	0.573058	0.122682	0.699562	0.0936329	0.693607	0.182727	0.537136	0.122372	0.595928	0.125182

## Sheet: ee_kd
d01s	sem	d02s	sem	d05s	sem	d1s	sem	d2s	sem	d5s	sem
1	0	1	0	1	0	1	0	1	0	1	0
0.311791	0.0372139	0.294352	0.0395803	0.283592	0.0264111	0.3118	0.0616223	0.298111	0.0377085	0.312037	0.0525475
0.294892	0.0335589	0.306948	0.0312451	0.288354	0.0473292	0.252217	0.0418375	0.275256	0.0396778	0.281578	0.0341372
0.60582	0.0485579	0.674665	0.0546483	0.75688	0.0473854	0.828678	0.0455071	0.889338	0.0411152	0.974525	0.0290203
0.297304	0.0311351	0.387677	0.0441033	0.293579	0.0314978	0.261222	0.0543078	0.245425	0.0521552	0.280585	0.0427175
0.326145	0.0255484	0.363713	0.0514208	0.31501	0.03872	0.313996	0.0491306	0.265645	0.0274396	0.31081	0.0314986

## Sheet: ie_kd
d01s	sem	d02s	sem	d05s	sem	d1s	sem	d2s	sem	d5s	sem
1	0	1	0	1	0	1	0	1	0	1	0
0.276331	0.0471589	0.209258	0.0250452	0.251413	0.0444321	0.287444	0.0419907	0.223656	0.0300722	0.373712	0.0625863
0.262668	0.0451714	0.22973	0.0287215	0.310768	0.0597012	0.255108	0.056163	0.205608	0.0301022	0.357939	0.0455559
0.51418	0.0538976	0.734391	0.0626001	0.77086	0.0816429	0.816123	0.0446944	0.849982	0.0515482	0.976891	0.0706732
0.231453	0.0529893	0.299141	0.0375532	0.214892	0.029671	0.244563	0.0401798	0.259329	0.0406968	0.389269	0.0913848
0.265216	0.0377229	0.2991	0.0632785	0.253306	0.0272444	0.215172	0.0257431	0.222824	0.0316927	0.358101	0.0720287
