# Supplementary material for: Progressive overfilling of readily releasable pool underlies short-term facilitation at recurrent excitatory synapses in layer 2/3 of the rat prefrontal cortex
Source: eLife. 2026 Feb 18;14:RP102923. doi: 10.7554/eLife.102923 (PMC12890252; doi:10.7554/eLife.102923)
Supplement: Figure 8—figure supplement 2—source data 1. [file elife-102923-fig8-figsupp2-data1.xlsx]

## Sheet: Anxiety_cent
Scr	KD
21.5333	20.4
11.8333	0.333333
0.133333	0
1.56667	0
11.1667	6.8
0	5.03333
0	6.3
60.6333	10.8667
0
31.9
6.9
15.5
0

## Sheet: Anxiety_peri
Scr	Syt7 KD
588.3	573.367
601.567	610.4
615.267	612.233
602.833	619.4
591.733	607.433
607.433	589.167
616.367	612.367
539.4	611.067
600.033
568.133
593.133
584.533
600.033

## Sheet: Motor
Scr	Syt7 KD
47.5471	63.5153
75.2941	77.8516
59.6322	47.8303
66.8512	54.5106
58.1756	63.4753
57.1841	69.9549
61.6313	54.2053
50.5744	55.4981
54.1359
50.872
62.7521
53.1845
70.499

## Sheet: EPM_anx
	Scr													Syt7 KD
closed	284.8	191.633	199.7	202.9	0.133333	213.067	295.333	205.3	225.533	294.367	298.767	201.133	198.7	159.433	218.933	237.433	206.467	219.867	225.8	214.667	155.467	254.467
open	2.73333	55.4333	74.5	61.2	197.467	67.9667	0	33.0667	65.8667	0.3	0	78.8667	57.6333	91.1667	39.5333	12.9667	67.5	33.8333	38.4333	9.13333	64.6	11.1

## Sheet: EPM_motor
Scr	Syt7 KD
16.738	27.2025
23.3611	20.335
25.0289	19.4607
21.1961	20.2978
12.9882	20.2266
18.8699	18.8824
18.0175	19.2663
12.8891	18.2845
21.5249	15.8887
16.7954
14.5761
13.4292
27.1147
