# Supplementary material for: Progressive overfilling of readily releasable pool underlies short-term facilitation at recurrent excitatory synapses in layer 2/3 of the rat prefrontal cortex
Source: eLife. 2026 Feb 18;14:RP102923. doi: 10.7554/eLife.102923 (PMC12890252; doi:10.7554/eLife.102923)
Supplement: Figure 8—source data 1. [file elife-102923-fig8-data1.xlsx]

## Sheet: acq_scr
Scr
8.84956	5.73497	8.82657	15.0902	2.73532	9.18285	1.54005	12.5043	2.5974	21.9745
94.335	80.0363	19.9334	80.1272	30.8997	99.9697	73.5232	48.4096	26.6889	100
96.3344	98.97	46.804	97.5159	79.9758	100	73.7049	73.4323	73.7958	99.7576
93.4262	99.6971	88.3975	73.7352	40.2605	100	69.4941	84.0957	53.8322	100
92.9112	99.1215	48.0158	96.8797	31.5056	19.3881	62.3447	76.4314	70.6756	98.8488
99.4547	75.7952	49.3184	98.5762	46.7434	99.8182	66.0406	80.2181	69.7061	99.1518

## Sheet: acq_kd
Syt7 KD
5.72348	5.97633	1.74693	4.3903	4.44776	0.838984	6.19469	4.10298	1.33318	2.19515	6.70038
14.4502	61.648	66.4344	97.1827	93.9412	51.2269	50.0151	39.382	79.3396	65.1621	35.4438
86.3678	89.0336	82.6719	100	100	54.4078	83.7322	93.3657	67.2826	86.1254	50.0151
66.4041	51.3784	81.5813	99.1518	99.9697	82.0357	73.6444	87.6098	82.3993	75.3711	24.7804
80.6119	65.4953	86.0345	92.6689	97.6068	57.8916	69.7364	99.9091	70.5241	91.033	42.684
54.6198	83.1566	67.01	86.3981	90.6695	76.4617	71.1603	92.9112	63.3141	62.1933	42.5629

## Sheet: dat2&3
Scr											Syt7 KD
86.869	69.2924	76.4109	85.1744	84.5009	76.4677	84.8341	85.8693	85.0113	81.4521		36.479	74.2981	23.7167	83.6571	84.9404	49.9929	64.2016	71.9725	38.0389	84.7845	34.9617
58.5729	23.1051	65.7933	72.4516	50.954	54.3257	39.3427	84.0303	70.3607	67.4137		35.6116	59.6053	35.3306	29.5544	42.4595	21.7133	44.7334	48.6474	48.2946	61.0625	33.1939
45.313	40.51	46.6749	87.0762	51.84	41.488	52.9194	86.5329	57.621	53.4338		23.0875	48.0658	40.6766	32.563	66.0895	20.3419	32.3892	29.0496	38.0397	26.3619	14.9812
60.0184	26.6733	12.6985	55.1049	27.361	32.2391	45.9373	82.1398	77.8857	66.2365		16.4989	22.3483	21.2989	18.4487	21.0508	21.7527	45.4056	39.074	26.9498	27.2901	18.2431
